1 Differential Contribution of Dopaminergic Transmission at D<sub>1</sub>- and D<sub>2</sub>-like Receptors to  
2 Cost/Benefit Evaluation for Motivation in Monkeys

3

4 Yukiko Hori<sup>1</sup>, Yuji Nagai<sup>1</sup>, Koki Mimura<sup>1</sup>, Tetsuya Suhara<sup>1</sup>, Makoto Higuchi<sup>1</sup>, Sebastien Bouret<sup>2</sup> and  
5 Takafumi Minamimoto<sup>1,\*</sup>

6

7 <sup>1</sup>Department of Functional Brain Imaging, National Institute of Radiological Sciences, National  
8 Institutes for Quantum and Radiological Science and Technology, Chiba, 263-8555, Japan.

9 <sup>2</sup>Team Motivation Brain & Behavior, Institut du Cerveau et de la Moelle épinière (ICM), Centre  
10 National de la Recherche Scientifique (CNRS), Hôpital Pitié Salpêtrière, 75013 Paris, France.

11 \*Correspondence: [minamimoto.takafumi@qst.go.jp](mailto:minamimoto.takafumi@qst.go.jp) (T.M.)

12

13 **Abstract**

14 It has been widely accepted that dopamine (DA) plays a major role in motivation, yet the specific  
15 contribution of DA signaling at D<sub>1</sub>-like receptor (D<sub>1</sub>R) and D<sub>2</sub>-like receptor (D<sub>2</sub>R) to cost-benefit  
16 trade-off remains unclear. Here, by combining pharmacological manipulation of DA receptors (DARs)  
17 and positron emission tomography imaging, we assessed the relationship between the degree of  
18 D<sub>1</sub>R/D<sub>2</sub>R blockade and changes in benefit- and cost-based motivation for goal-directed behavior of  
19 macaque monkeys. We found that the degree of blockade of either D<sub>1</sub>R or D<sub>2</sub>R was associated with a  
20 reduction of relative incentive effect of reward amount, where D<sub>2</sub>R blockade had a stronger effect.  
21 Workload-discounting was selectively increased by D<sub>2</sub>R antagonism, whereas delay-discounting was  
22 similarly increased after D<sub>1</sub>R and D<sub>2</sub>R blockades. These results provide fundamental insight into the  
23 specific actions of DARs in the regulation of the cost/benefit trade-off and important implications for  
24 motivational alterations in both neurological and psychiatric disorders.

25

26 **Introduction**

27 In our daily lives, we routinely determine whether to engage or disengage in an action according to its  
28 benefits and costs i.e., motivational value. For motivational value computation, the expected value of  
29 benefits (i.e., rewards) has a positive influence, while the cost necessary to earn the expected reward  
30 has a negative impact and discounts the net value of reward [1-3]. Arguably, the dopamine (DA)

31 system plays a central role in the benefit- and cost-based computation of motivational value. Phasic  
32 firing of midbrain DA neurons correlates with the magnitude of future rewards, while it decreases  
33 according to the expected cost to be expended for the rewards, such as physical effort, time delay to  
34 reward, and reward probability [4-9]. DA neurons are also implicated in conveying information about  
35 vigor in a sustained manner (“tonic firing”; [10, 11]). Several studies demonstrated that DA  
36 neurotransmission was causally involved in incentive motivation, i.e., in the enhancement of actions  
37 by the amount of expected reward [12-16]. In humans, the alteration of DA transmission is frequently  
38 associated with various pathological impairments of motivation such as anergia, fatigue, psychomotor  
39 retardation, and apathy, which are frequently observed in people with depression, schizophrenia or  
40 Parkinson’s disease [14, 17-19]. But even if DA signaling is clearly involved in the regulation of  
41 behavior based on the cost/benefits trade-off, the underlying mechanisms remain debated.

42 DA signaling is mediated at post-synaptic sites by two classes of DA receptors (DARs), the  
43 D<sub>1</sub>-like receptor (D<sub>1</sub>R) and the D<sub>2</sub>-like receptor (D<sub>2</sub>R), and both classes are thought to be involved in  
44 motivation and decision-making based on the cost/benefits trade-off. For instance, blocking either D<sub>1</sub>R  
45 or D<sub>2</sub>R reduced the likelihood and speed of engagement of cued action to obtain a future reward [20,  
46 21]. Blockade of either D<sub>1</sub>R or D<sub>2</sub>R biases animals' choices in tasks manipulating the cost/benefits  
47 trade-off, where the cost involved physical effort (effort-discounting, [22-24]) or time (delay-  
48 discounting, [23, 25]). But since in most of these studies cost and reward were not manipulated

49 independently, the relative impact of DA treatment on the cost vs. benefit components of evaluation  
50 remains hard to identify (see [9], for further discussion). To clarify the relation between DA, reward,  
51 and cost, it is thus critical to use behavioral task where reward and cost are manipulated independently.

52 Another challenge of pharmacological manipulations is how to compare the role of two  
53 receptor subtypes quantitatively. Previous studies described the effect of DAR blockade according to  
54 the antagonist dose-response relationship for each DAR subtype. However, because each antagonist  
55 has different characteristics (e.g., target affinity, brain permeability, biostability), the relationships  
56 cannot be directly compared together with the doses. On the other hand, receptor occupancy appears  
57 to provide an objective reference for receptor blockade. For example, positron emission tomography  
58 (PET) studies of patients have shown that in vivo D<sub>2</sub>R occupancy is a reliable predictor of clinical and  
59 side effects of antipsychotic drugs [26, 27]. Similarly, receptor occupancy has been measured in rats  
60 and monkeys, and the relationship with the behavioral effects following D<sub>2</sub>R antagonists [28-30]. Thus,  
61 to better understand the role of DARs in motivation, it would be critical to monitor occupancy  
62 following antagonists and compare the effects on distinct components of decision-making along with  
63 occupancy.

64 In the present study, we aimed to quantify and directly compare the roles of DA signaling  
65 via D<sub>1</sub>R and D<sub>2</sub>R in decision-making based on the trade-off between reward and two types of costs  
66 (time vs workload) in macaque monkeys. For this purpose, we manipulated DA transmission by

67 systemic application of DAR-specific antagonists and examined the relationship between the  
68 occupancy of D<sub>1</sub>R vs D<sub>2</sub>R and the changes in sensitivity to reward magnitude, workload and delay.  
69 We established the dynamic action of DAR antagonists by measuring the degree of DA receptor  
70 occupancy using *in vivo* PET imaging with selective radioligands. To quantify the effects of DAR  
71 blockades on incentive motivation, we used a behavioral task in which we manipulated the predicted  
72 reward size. To quantify the effects of DA manipulation on cost-based decision-making (i.e., effort or  
73 delay discounting), we used a similar behavioral task in which workload or delay to obtain a reward  
74 was manipulated. Based on our data, D<sub>1</sub>R and D<sub>2</sub>R have similar roles in incentive-based motivation,  
75 whereas D<sub>2</sub>R is exclusively related to effort-based motivation.

76

## 77 **Results**

### 78 **PET measurement of D<sub>1</sub>R/D<sub>2</sub>R occupancy following systemic antagonist administration**

79 To establish appropriate antagonist dose setting and experimental timing, we measured the degree of  
80 receptor blockade (i.e., receptor occupancy) following systemic administration of DAR antagonists.  
81 We performed PET imaging with selective radioligands for D<sub>1</sub>R ([<sup>11</sup>C]SCH23390) and D<sub>2</sub>R  
82 ([<sup>11</sup>C]raclopride) to measure specific radioligand binding in the brain for both baseline (without drug  
83 administration) and following antagonist administration. Receptor occupancy was estimated as the  
84 degree of reduction of specific binding (S1 Fig, see methods) [31].

85 For D<sub>1</sub>R measurement, high radiotracer binding was seen in the striatum at baseline  
86 condition (Fig 1A, Baseline). We used non-radiolabeled SCH23390 for D<sub>1</sub>R antagonist at different  
87 doses (10, 30, 50, and 100 µg/kg). The striatal binding was diminished by pre-treatment with systemic  
88 administration of SCH23390 in a dose-dependent manner (Fig 1A). In 3 monkeys, we measured the  
89 relationship between D<sub>1</sub>R occupancy and the dose of SCH23390, which was approximated by a Hill  
90 function (Fig 1C; Eq. 4). We found that treatment with SCH23390 at a dose of 100 and 30 µg/kg  
91 corresponded to 81% and 57% of D<sub>1</sub>R occupancy, respectively.

92

93 **Fig 1. D<sub>1</sub>R and D<sub>2</sub>R occupancy measured by PET.** (A) Representative horizontal MR (left) and  
94 parametric PET images showing specific binding (BP<sub>ND</sub>) of [<sup>11</sup>C]SCH23390 at baseline and following  
95 drug-treatment with SCH23390 (10, 30, 50, or 100 µg/kg, i.m.). (B) Representative horizontal MR  
96 (left) and parametric PET images showing specific binding (BP<sub>ND</sub>) of [<sup>11</sup>C]raclopride at baseline and  
97 on 0 to 7 days after injection with haloperidol (10 µg/kg, i.m.). Color scale indicates BP<sub>ND</sub> (regional  
98 binding potential relative to non-displaceable radioligand). (C) Occupancy of D<sub>1</sub>R measured at striatal  
99 ROI is plotted against the dose of SCH23390. (D) Occupancy of D<sub>2</sub>R measured at striatal ROI is  
100 plotted against the day after haloperidol injection. Dotted curves in C and D are the best fit of Eqs. 4  
101 and 5, respectively.

102

103 Haloperidol was used for D<sub>2</sub>R antagonism. Unlike SCH23390, which was rapidly washed  
104 from the brain within a few hours, a single dose of haloperidol treatment was expected to show  
105 persistent D<sub>2</sub>R occupancy for the following several days as described in humans and mice [32, 33],  
106 providing the opportunity for testing different occupancy conditions. The baseline [<sup>11</sup>C]raclopride PET  
107 image showed the highest radiotracer binding in the striatum (Fig 1B, Baseline). As expected, striatal  
108 binding was diminished not only just after pre-treatment with haloperidol (10 µg/kg, i.m.), but also  
109 until post-haloperidol day 2 (Fig 1B, *Day 2*). Binding had recovered to the baseline level by day 7 (Fig  
110 1B, *Day 7*). We measured D<sub>2</sub>R occupancy on days 0, 1, 2, 3, and 7 after a single haloperidol injection  
111 in 3 monkeys. An exponential decay function approximated the relationship between D<sub>2</sub>R occupancy  
112 and post-haloperidol days (Eq. 5); a single injection of haloperidol yielded 78% and 48% of D<sub>2</sub>R  
113 occupancy on days 0 and 1, respectively (Fig 1D).

114

### 115 **Effects of D<sub>1</sub>R- and D<sub>2</sub>R-blockade on incentive motivation**

116 To assess the effect of blockade of D<sub>1</sub>R and D<sub>2</sub>R on incentive motivation, we tested 2 monkeys with  
117 a reward-size task (Fig 2A). In every trial of this task, the monkeys were required to release a bar when  
118 a visual target changed from red to green to get a liquid reward. A visual cue indicated the amount of  
119 reward (1, 2, 4, or 8 drops) at the beginning of each trial (Fig 2A). After a few months of training, the  
120 monkeys were able to release the bar in response to the Go signal. However, they never performed

121 perfectly, and failures consisted of either releasing the bar too early or too late. These failures were  
122 usually observed in small reward trials or close to the end of daily sessions. As in previous experiments  
123 using a single option presentation which monkeys can perform correctly or not, failures were regarded  
124 as trials in which the monkeys are not sufficiently motivated to correctly release the bar (i.e., refusal)  
125 [2]. Hence, the frequency of refusal trials can be used as a behavioral measure of motivation [8, 34-  
126 37]. Besides, we have shown that the refusal rate ( $E$ ) is inversely related to reward size ( $R$ ), which has  
127 been formulated with a single free parameter  $a$  [2] (Fig 2B),

$$128 \quad E = 1/aR \quad (1).$$

129 In agreement with these previous studies, both monkeys exhibited the inverse relationship in non-  
130 treatment condition (Fig 2D and 2E, Control).

131

132 **Fig 2. D<sub>1</sub>R/D<sub>2</sub>R blockade increased refusal rates in reward-size task.** (A) Reward-size task. *Left:*  
133 Sequence of events during a trial. *Right:* The association between visual cues and reward size. (B)  
134 Schematic illustration of inverse function between refusal rate and reward size. (C) Schematic  
135 illustration of two explanatory models of decrease in motivation. *Left:* Increase in refusal rate (i.e.,  
136 decrease in motivation) in relation to reward size caused by decrease in incentive impact ( $a$ ). *Right:*  
137 An alternative model explaining increase in refusal rate irrespective of reward size. (D-E) Behavioral  
138 data under D<sub>1</sub>R and D<sub>2</sub>R blockade, respectively. CON, control. Refusal rates (mean  $\pm$  SEM) as a



139 function of reward size for monkeys KN (top) and ST (bottom). Dotted curves are the best-fit of  
140 inverse function (S1 Table).

141

142 We found that DAR blockade decreases incentive motivation, leading to an increase in  
143 refusal rate of the task. For example, D<sub>1</sub>R blockade (systemic injection of SCH23390) increased the  
144 refusal rates particularly in smaller reward size trials (Fig 2D; 2-way ANOVA, treatment,  $F_{(4, 19)} = 1.2$ ,  
145  $p < 0.05$ ; reward size,  $F_{(3, 19)} = 105$ ,  $p < 0.001$ ; interaction,  $F_{(12, 19)} = 2.4$ ,  $p < 0.05$ ). We considered  
146 whether this increase was due to a reduction in the incentive impact of reward, or a decrease in  
147 motivation irrespective of reward size. These factors can be captured by a decrease in parameter  $a$  of  
148 the inverse function and implementing intercept  $e$ , respectively (Fig 2C). To quantify the increases in  
149 refusal rate, we compared 4 models considering these two factors as random effects. For both monkeys,  
150 the increases in refusal rate were explained by a decrease in the parameter  $a$  due to the treatment, while  
151 the inverse relation with reward size was maintained (*model #3* for monkey KN and *model #1* for ST;  
152 S1 Table). We then assessed changes in parameter  $a$ , which indicates the incentive impact of reward  
153 size. As shown Figure 3A, normalized  $a$  became smaller as the dose of SCH23390 was increased to  
154 30 or 50  $\mu\text{g}/\text{kg}$ , but then it increased at the highest dose (100  $\mu\text{g}/\text{kg}$ ) (Fig 3A, left). Thus, incentive  
155 impact did not decrease monotonically with the dose, but changed in a U-shaped manner in both  
156 monkeys.

157

158 **Fig 3. Effect of D<sub>1</sub>R/D<sub>2</sub>R blockade on incentive impact of reward size.** (A) Bars indicate normalized  
159 incentive impact ( $a$ ) for each treatment condition under D<sub>1</sub>R blockade for monkeys KN and ST. The  
160 value was normalized by the value of control condition. (B) Same as A, but for D<sub>2</sub>R blockade. (C)  
161 Relationship between an incentive impact and occupancy for D<sub>1</sub>R (blue) and D<sub>2</sub>R blockade (red).  
162 Filled circles indicate the mean of two monkeys, while individual data was plotted as triangles  
163 (monkey KN) and rectangles (monkey ST), respectively.

164

165 For the D<sub>2</sub>R blockade, the monkeys were tested with the task 15 min after a single injection  
166 of haloperidol (10 µg/kg, i.m., day 0) and were then successively tested on the following days 1, 2, 3,  
167 4 and 7. We also found a significant increase in refusal rates for D<sub>2</sub>R blockades in both monkeys (Fig  
168 2E). The refusal rates were highest on the day of haloperidol injection, after which they decreased as  
169 the days went by (2-way ANOVA, treatment,  $F_{(6, 27)} = 9.6, p < 0.001$ ). The increases in refusal rate  
170 were reward size-dependent (reward size,  $F_{(3, 27)} = 186, p < 0.001$ ; treatment  $\times$  reward size,  $F_{(18, 27)} =$   
171  $3.7, p < 0.01$ ). Similar to the D<sub>1</sub>R blockade, the increases in refusal rate due to D<sub>2</sub>R blockade were  
172 explained solely by a decrease of parameter  $a$  according to the days following the treatment for both  
173 monkeys (*model #1* for both monkeys KN and ST; S1 Table). Our model-based analysis revealed that

174  $a$  decreased about 40% on the day of haloperidol injection and the following 3 days as compared to  
175 control, and then recovered to almost the control level on day 7 (Fig 3B).

176 To compare the effects between D<sub>1</sub>R and D<sub>2</sub>R blockades directly, we plotted changes in  
177 incentive impact along with the degree of blockage (Fig 3C). In both D<sub>1</sub>R and D<sub>2</sub>R blockades,  $a$   
178 declined according to the increase in occupancy; it gradually declined as D<sub>1</sub>R occupancy increased,  
179 but then increased at the highest occupancy, whereas it steeply declined until 20% D<sub>2</sub>R occupancy,  
180 and then continued to decrease slightly until 80% occupancy (Fig 3C). At 20 – 80 % occupancy, the  
181 incentive impacts for D<sub>2</sub>R blockade stayed lower than those for D<sub>1</sub>R, suggesting a stronger sensitivity  
182 of incentive impact to D<sub>2</sub>R blockade.

183 We sought to verify that the effect of D<sub>2</sub>R antagonism was not specific for haloperidol and  
184 to validate the comparison between D<sub>1</sub>R and D<sub>2</sub>R in terms of receptor occupancy. We examined the  
185 behavioral effect of another D<sub>2</sub>R antagonist, raclopride, at a dose yielding about 50% receptor  
186 occupancy (10 µg/kg, i.m.; S2 Fig). Following this dose of raclopride administration, a monkey again  
187 exhibited increased refusal rates, which was explained by inverse function with  $a = 5.2$  (drop<sup>-1</sup>), a  
188 comparative value of incentive impact observed at 50% D<sub>2</sub>R occupancy with haloperidol [ $a = 5.4$   
189 (drop<sup>-1</sup>), day 1; S2B Fig]. Thus, our data suggest that D<sub>2</sub>R antagonism-induced reduction of the  
190 incentive effect seems to reflect the degree of receptor blockade regardless of the antagonist used.

191

192 **Effects of D<sub>1</sub>R- and D<sub>2</sub>R-blockade on response speed**

193 Previous studies have reported that systemic administration of D<sub>1</sub>R or D<sub>2</sub>R antagonists increases  
194 reaction times (RTs) in monkeys (e.g., [38]). Consistent with those studies, DAR blockade in our study  
195 prolonged RTs in a treatment-dependent manner. For D<sub>1</sub>R blockade, RTs were increased according to  
196 the antagonist dose (S3A and S3B Fig; 2-way ANOVA, treatment,  $F_{(4, 19)} = 13.2, p < 0.001$ ), while the  
197 effect of reward size on RTs was consistent without significant interaction (reward size,  $F_{(3, 19)} = 18.5,$   
198  $p < 0.001$ ; treatment  $\times$  reward size,  $F_{(12, 19)} = 0.4, p = 0.96$ ; e.g., S3C Fig). In parallel with prolonged  
199 RTs, D<sub>1</sub>R antagonism also increased the proportion of late release (2-way ANOVA, treatment,  $F_{(4, 19)}$   
200  $= 4.6, p < 0.01$ ; reward size,  $F_{(3, 19)} = 3.0, p = 0.056$ , treatment  $\times$  reward size,  $F_{(12, 19)} = 0.4, p = 0.94$ ;  
201 e.g., S3D Fig). These results suggest that D<sub>1</sub>R blockade also influences response speed, probably due  
202 to slowing cognitive processing as implicated in previous studies [39, 40]. Thus, the effect of D<sub>1</sub>  
203 manipulation on value-based decision was somehow related to its effects on the action itself.

204 D<sub>2</sub>R blockade also prolonged RTs, typically at days 0 and 1 (treatment,  $F_{(6, 27)} = 5.6, p <$   
205  $0.001$ ), while the reward size effect remained without interaction (reward size,  $F_{(3, 27)} = 42, p < 0.001$ ;  
206 treatment  $\times$  reward size,  $F_{(18, 27)} = 0.4, p = 0.99$ ; e.g., S3E-G Fig). Prolonged RTs in 8 drop trials were  
207 limited (S3F Fig). In contrast to D<sub>1</sub>R manipulation, D<sub>2</sub>R blockade did not change the refusal patterns  
208 (i.e., too early or late release) (2-way ANOVA, treatment,  $F_{(6, 27)} = 1.2, p = 0.31$ ; reward size,  $F_{(3, 27)} =$   
209  $7.6, p < 0.001$ , treatment  $\times$  reward size,  $F_{(18, 27)} = 0.8, p = 0.68$ ; e.g., S3H Fig). Thus, the effect of D<sub>2</sub>

210 manipulation on value-based decision was relatively independent from the effects on cognitive or  
211 motor speed itself.

212

### 213 **Little influence of D<sub>1</sub>R- or D<sub>2</sub>R-blockade on internal drive or relative reward value**

214 The behavioral data shown above suggest that blockade of DAR attenuates the incentive effect of  
215 reward on behavior. However, two important questions remain: (1) Whether the relative reward value  
216 is unaffected in general? (2) Whether the internal drive is unaffected? Previous studies in rodents  
217 showed that DA antagonism does not alter water consumption or preference for sucrose over water in  
218 rats [15, 41]. We confirmed this in primates by examining the effect of DAR blockade on water intake  
219 and sucrose preference in 2 monkeys. As expected, treatment with D<sub>1</sub>R or D<sub>2</sub>R antagonist did not  
220 affect overall intake (one-way ANOVA, treatment,  $F_{(2, 25)} = 0.06$ ,  $p = 0.93$ ) or sucrose preference  
221 (treatment,  $F_{(2, 18)} = 0.70$ ,  $p = 0.51$ ; S4A Fig). We also assessed blood osmolality, a physiological index  
222 of dehydration and thirst drive [42], before and after the preference test. Again, DAR treatment had  
223 no significant influence on overall osmolality or recovery of osmolality (rehydration) (2-way ANOVA,  
224 main effect of treatment,  $F_{(2, 35)} = 0.08$ ,  $p = 0.92$ ; treatment  $\times$  pre-post,  $F_{(2, 35)} = 0.15$ ,  $p = 0.87$ ; S4B  
225 Fig). These results suggest that DAR blockade has no influence on physiological needs or relative  
226 reward value. These results also support the notion that the increased refusal rate was not directly due  
227 to a reduction of thirst drive.

228

229 **Differential effects of D<sub>1</sub>R and D<sub>2</sub>R blockades on workload and delay discounting**

230 Next, we assessed the effect of selective DAR blockade on cost-based motivation. For this purpose,  
231 we used a work/delay task (Fig 4A), where the basic features were the same as those in reward-size  
232 task. There were two trial types. In the work trials, the monkeys had to perform 0, 1, or 2 additional  
233 instrumental trials to obtain a reward. In the delay trials, after the monkeys correctly performed one  
234 instrumental trial, a reward was delivered 0–7 seconds later. The number of trials or length of delay  
235 was indicated by a visual cue presented throughout the trial. In the first trial after the reward, the visual  
236 cue informed how much would need to be paid in order to get the next reward. Therefore, we assessed  
237 the performance of the monkeys on the first trials to evaluate the impact of expected cost on motivation  
238 and decision-making. We showed that the monkeys exhibited linear relationships between refusal rate  
239 ( $E$ ) and remaining costs ( $CU$ ) for both work and delay trials, as follows:

240 
$$E = kCU + E_0 \quad (2),$$

241 where  $k$  is a coefficient and  $E_0$  is an intercept [43] (Fig 4B). By extending the inference and formulation  
242 of reward-size task (Eq. 1), this linear effect proposes that the reward value is hyperbolically  
243 discounted by cost, where the coefficient  $k$  corresponds to discounting factors. Consistently, refusal  
244 rates of control condition increased as the remaining cost increased (e.g., Fig 4C, control; 2-way  
245 ANOVA, cost type  $\times$  remaining cost, main effect of remaining cost,  $F_{(2, 46)} = 109, p < 10^{-15}$ ). Figure

246 4B illustrates our hypothesis that DAR blockade increases cost sensitivity (i.e, discounting factor,  $k$ ),  
247 leading to an increase in refusal rate of the task.

248

249 **Fig 4. Differential effects of D<sub>1</sub>R and D<sub>2</sub>R blockade on cost-based motivational valuation.** (A)

250 The work/delay task. The sequence of events (left) and relationships between visual cues and trial

251 schedule in the work trials (right top 3 rows) or delay duration in the delay trials (left bottom 3 rows)

252 are shown. CU denotes the remaining (arbitrary) cost unit to get a reward, i.e., either remaining

253 workload to perform trial(s) or remaining delay periods. (B) Schematic illustration of an explanatory

254 model of increases in refusal rate by increasing cost sensitivity ( $k$ ). (C) Effects of D<sub>1</sub>R blockade.

255 Representative relationships between refusal rates (monkey KN; mean  $\pm$  SEM) and remaining costs

256 for workload (green) and delay trials (black). Saline control (Control), moderate (30  $\mu$ g/kg; MO) and

257 high D<sub>1</sub> occupancy treatment condition (100  $\mu$ g/kg; HO) are shown. Green and black lines are the

258 best-fit lines for Eqs. 6 and 7, respectively. (D) Effects of D<sub>2</sub>R blockade. Non-treatment control

259 (Control), moderate (1 day after haloperidol; MO) and high D<sub>2</sub> occupancy treatment conditions (day

260 of haloperidol; HO) are shown. Others are the same for C. (E) Comparison of effects between D<sub>1</sub>R

261 and D<sub>2</sub>R blockade on workload-discounting parameter ( $k_w$ ). Bars and symbols indicate mean and

262 individual data, respectively. (F) Comparison of effects between D<sub>1</sub>R and D<sub>2</sub>R blockade on delay-

263 discounting parameter ( $k_d$ ).

264

265       To compare the behavioral effect of D<sub>1</sub>R vs D<sub>2</sub>R antagonisms at the same degree of receptor  
266 blockade, we assessed the performance of the monkeys under two comparable levels of DAR  
267 occupancy for D<sub>1</sub>R and D<sub>2</sub>R, moderate occupancy (MO, ~50%) and high occupancy (HO, ~80%), and  
268 under baseline condition (non-treatment) as a control. D<sub>1</sub>R blockades selectively increased the refusal  
269 rates in delay trials in an occupancy-dependent manner (3-way ANOVA, occupancy × cost type,  $F_{(2, 142)} = 5.2, p < 0.01$ ; Fig 4C). By contrast, D<sub>2</sub>R blockade preferentially increased the refusal rates in  
270 work trials (occupancy × cost type,  $F_{(2, 142)} = 25, p < 10^{-9}$ ; Fig 4D). Like our previous study [43], two  
271 linear regression models (Eqs. 6 and 7, see methods) simultaneously fitted the data well in all cases  
272 (average  $R^2 > 0.9$ ), allowing us to measure the effects of DAR as the increased steepness of cost-  
273 discounting of motivational value. We found that workload-discounting ( $k_w$ ) was specifically  
274 increased by D<sub>2</sub>R blockade in an occupancy-dependent manner (2-way ANOVA, receptor subtype ×  
275 occupancy,  $F_{(2, 10)} = 14.1, p < 0.01$ ; Fig 4E). Delay-discounting, on the other hand, was inclined to  
276 increase according to the degree of DAR blockade irrespective of receptor subtype (main effect of  
277 occupancy,  $F_{(2, 10)} = 4.0, p = 0.054$ ; receptor subtype × occupancy,  $F_{(2, 10)} = 0.3, p = 0.74$ ; Fig 4F).

278       In line with what we found in the reward-size task, D<sub>1</sub>R blockade significantly increased the  
279 proportion of late release (3-way ANOVA, main effect of treatment,  $F_{(2, 34)} = 9.0, p < 0.001$ ), whereas  
280 D<sub>2</sub>R blockade did not (main effect of treatment,  $F_{(2, 33)} = 0.3, p = 0.73$ ). The frequency of touching and  
281



282 releasing the bar during delay periods — actions that have no instrumental role in delay trials — was  
283 also unaffected (2-way ANOVA, treatment  $\times$  delay duration; treatment;  $D_1R$ ,  $F_{(2, 10)} = 2.1$ ,  $p = 0.16$ ;  
284  $D_2R$ ,  $F_{(2, 10)} = 1.9$ ,  $p = 0.21$ ). Thus,  $D_1R$  blockade also affects the response itself in the work/delay task  
285 in addition to increases in cost-discounting.

286           Considering the direct and indirect striatal output pathways where neurons exclusively  
287 express  $D_1R$  and  $D_2R$ , respectively, and the opposition believed to exist between the pathways in  
288 general, it should be possible to counterbalance the effects of those antagonists with each other [44].  
289 To test this possibility, we examined the behavioral effects of both  $D_1R$  and  $D_2R$  blockades at the same  
290 occupancy level. After treatment with both SCH23390 (100  $\mu\text{g}/\text{kg}$ ) and haloperidol (10  $\mu\text{g}/\text{kg}$ ),  
291 seemingly achieving  $\sim 80\%$  of occupancy for both subtypes (cf. Fig 1C and 1D), all monkeys stopped  
292 performing the task with a small number of correct trials (1-13% of control). When we treated the  
293 monkeys with SCH23390 (30  $\mu\text{g}/\text{kg}$ ) on the day following that of haloperidol injection (i.e., both  $D_1R$   
294 and  $D_2R$  assumed to be occupied at  $\sim 50\%$ ), the monkeys had higher refusal rates in delay trials than  
295 control (Fig 5A,  $D_1R+D_2R$  block) and displayed a higher discounting factor (Fig 5B, delay). By  
296 contrast, this simultaneous  $D_1R$  and  $D_2R$  blockade appeared to attenuate the effect of  $D_2R$  antagonism  
297 on workload in 2 of 3 monkeys; the refusal rates in work trials were not as high as in  $D_2R$  blockade  
298 alone (Fig 5A), and the workload-discounting factor ( $k_w$ ) became the value between that for  $D_1$  and  
299  $D_2$  antagonisms (Fig 5B, workload). A similar counterbalance was also seen in the relative strength of

300 discounting (ratio of  $k_w/k_d$ ) as well as the motivation for the minimum cost trials ( $E_0$ ) (Fig 5B). These  
301 results suggest that blocking both receptor subtypes tends to induce a synergistic effect on delay-  
302 discounting, while it compensates the effects on workload-discounting.

303

304 **Fig 5. Effect of both D<sub>1</sub>R and D<sub>2</sub>R blockades on cost evaluation for motivation.** (A) Representative  
305 relationship between refusal rates (in monkey KN; mean  $\pm$  SEM) and remaining costs for workload  
306 (green) and delay trials (black). (B) Best-fit parameters, workload-discounting ( $k_w$ ), delay-discounting  
307 ( $k_d$ ), workload/delay ratio ( $k_w/k_d$ ), and intercept ( $E_0$ ), are plotted for each treatment condition. Bars and  
308 symbols indicate mean and individual data, respectively. D<sub>1</sub>R+D<sub>2</sub>R block indicates the data obtained  
309 under both D<sub>1</sub>R and D<sub>2</sub>R blockades at moderate occupancy, while D<sub>1</sub>R and D<sub>2</sub>R blockades at high  
310 occupancy resulted in almost no correct performance (see text). All parameters are derived from the  
311 best fit for Eqs. 6 and 7, respectively.

312

### 313 **Discussion**

314 Combining the PET occupancy study and pharmacological manipulation of D<sub>1</sub>- and D<sub>2</sub>-like receptors  
315 with quantitative measurement of motivation in monkeys, the current study demonstrated dissociable  
316 roles of the DA transmissions via D<sub>1</sub>R and D<sub>2</sub>R in the computation of the cost/benefits trade-off to  
317 guide action. To the best of our knowledge, this is the first study to directly compare the contribution

318 of dopamine D<sub>1</sub>R and D<sub>2</sub>R along with the degree of receptor blockade. Using model-based analysis,  
319 we showed that DAR blockade had a clear quantitative effect on the sensitivity of animals to  
320 information about potential costs and benefits, without any qualitative effect on the way monkeys  
321 integrated costs and benefits and adjusted their behavior. We showed that blockade of D<sub>1</sub>R or D<sub>2</sub>R  
322 reduced the incentive impact of reward as the degree of DAR blockade increased, and the incentive  
323 impact was more sensitive to the D<sub>2</sub>R blockade than the D<sub>1</sub>R blockade at lower occupancy. In cost-  
324 discounting experiments, we could dissociate the relation between each DAR type and workload vs  
325 delay-discounting: workload-discounting was increased exclusively by D<sub>2</sub>R antagonism, whereas  
326 delay-discounting was increased by DAR blockade irrespective of receptor subtype. When both D<sub>1</sub>R  
327 and D<sub>2</sub>R were blocked simultaneously, the effects were synergistic and strengthened for delay-  
328 discounting, while the effects were antagonistic and diminished for workload-discounting.

329

330 *DA controls the incentive effect of expected reward amount*

331 Previous pharmacological studies have shown that DAR blockade decreased the speed of action and/or  
332 probability of engagement behavior [20, 21]. However, the previous studies did not address the  
333 quantitative effect of DAR blockade on incentive motivation; more specifically, there was a lack of  
334 experimental data to model the causal relationship among DAR stimulation, reward, and motivation.  
335 In the present study, we used a behavioral paradigm that enabled us to formulate and quantify the

336 relationship between reward and motivation [2] (Fig 2). Our finding, a reduction of incentive impact  
337 due to DAR antagonism (cf., Fig 3) is in line with the incentive salience theory, that is, DA  
338 transmission attributes salience to incentive cue to promote goal-directed action [12]. The lack of  
339 effect of DA manipulation on satiety and spontaneous water consumption are compatible with the idea  
340 that DA manipulation has a stronger effect on incentive processes (influence of reward on action) than  
341 on hedonic processes (evaluation itself, pleasure associated with consuming reward), but further  
342 experiments would be necessary to address that point directly [12].

343         Our model-based analysis indicates that DAR blockade only had a quantitative influence (a  
344 reduction of incentive impact of reward) without changing the qualitative relationship between reward  
345 size and behavior. This is in marked contrast with the reported effects of inactivation of brain areas  
346 receiving massive DA inputs, including the orbitofrontal cortex, rostromedial caudate nucleus, and  
347 ventral pallidum. Indeed, in experiments using nearly identical tasks and analysis, inactivation or  
348 ablation of these regions produced a qualitative change in the relationship between reward size and  
349 behavior (more specifically, a violation of the inverse relationship between reward size and refusal  
350 rates) [36, 37, 45]. Thus, the influence of DAR cannot be understood as a simple permissive or  
351 activating effect on target regions. The specificity of the DAR functional role is further supported by  
352 the subtle, but significant difference between the behavioral consequences of blocking of D<sub>1</sub>R vs D<sub>2</sub>R.  
353 By combining a direct measure of DAR occupancy and quantitative behavioral assessment, the present

354 study demonstrates that the incentive impact of reward is more sensitive to D<sub>2</sub>R blockade than D<sub>1</sub>R  
355 blockade, and especially at a lower degree of occupancy (cf. Fig 3C). Moreover, the dose-response  
356 relation between occupancy and behavior was monotonous for D<sub>2</sub>R, but U-shaped for D<sub>1</sub>R. Although  
357 this might be surprising, such non-monotonic effects have been repeatedly reported. For example,  
358 working memory performance and related neural activity in the prefrontal cortex takes the form of an  
359 "inverted-U" shaped curve, where too little or too much D<sub>1</sub>R activation impairs cognitive performance  
360 [3, 46, 47]. As for the mechanisms underlying the distinct functional relation between the behavioral  
361 effects of D<sub>1</sub>R vs D<sub>2</sub>R blockade, it is tempting to speculate that this is related to a difference in their  
362 distribution, their affinity and the resulting relation with phasic vs tonic DA action. Indeed, DA affinity  
363 for D<sub>2</sub>R is ~100 times higher than that for D<sub>1</sub>R [48]. This is directly in line with the higher behavioral  
364 sensitivity of D<sub>2</sub>R manipulation, compared to that of D<sub>1</sub>R. Moreover, in the striatum, a basal DA  
365 concentration of ~5–10 nM is sufficient to constantly stimulate D<sub>2</sub>R. Using available biological data,  
366 a recent simulation study showed that the striatal DA concentration produced by the tonic activity of  
367 DA neurons (~40 nM) would occupy 75% of D<sub>2</sub>R but only 3.5% of D<sub>1</sub>R [49]. Thus, blockade of D<sub>2</sub>R  
368 at low occupancy may interfere with tonic DA signaling, whereas D<sub>1</sub>R occupancy would only be  
369 related to phasic DA action, i.e., when transient but massive DA release occurs (e.g., in response to  
370 critical information about reward). We acknowledge that this remains very hypothetical, but

371 irrespective of the underlying mechanisms, our data clearly support the idea that DA action on D<sub>1</sub>R vs

372 D<sub>2</sub>R exerts distinct actions on their multiple targets to enhance incentive motivation.

373

374 *DA transmission via D<sub>1</sub>R and D<sub>2</sub>R distinctively controls cost-based motivational process*

375 Although many rodent studies have demonstrated that attenuation of DA transmission alters not only

376 benefit- but also cost-related decision-making, the exact contribution of D<sub>1</sub>R and D<sub>2</sub>R remains elusive.

377 For example, reduced willingness to exert physical effort to receive higher reward was similarly found

378 following D<sub>1</sub> and D<sub>2</sub> antagonisms in some studies, while it was observed exclusively by D<sub>2</sub> antagonism

379 in other studies [22, 50, 51]. This inconsistency may arise because previous studies usually

380 investigated the effect of antagonism on D<sub>1</sub>R and D<sub>2</sub>R along with a relative pharmacological

381 concentration (e.g., low and high doses). In the present study, PET-assessed DAR manipulation

382 allowed us to directly compare the behavioral effect between D<sub>1</sub>R and D<sub>2</sub>R with an objective reference,

383 namely occupancy (i.e., ~50% and ~80% occupancy). Besides, the exact nature of the cost (effort vs

384 delay) has sometimes been difficult to identify, and effort manipulation is often strongly correlated

385 with reward manipulation (typically when the amount of reward earned is instrumentally related to the

386 amount of effort exerted, see [9]). Here, using a task manipulating forthcoming workload

387 independently from reward value, we demonstrated that blockade of D<sub>2</sub>R, but not D<sub>1</sub>R, increased

388 workload-discounting in an occupancy-dependent manner while maintaining linearity (*cf.*, Fig 4E). In

389 addition, D<sub>1</sub>R and D<sub>2</sub>R had synergistic effects in the delay-discounting tasks but antagonistic effects  
390 in the workload-discounting task, which also indicates that the DAR contribution to delay- vs  
391 workload-discounting is qualitatively different. Thus, even if workload trials also include a delay  
392 component in our task, the distinct effects of DAR manipulations confirm that the nature of the cost  
393 in the workload and delay trials differs, at least from a neurobiological point of view [43]. Thus, these  
394 results extend previous studies demonstrating increased effort-discounting by D<sub>2</sub>R blockade [23, 52]  
395 and support the notion that DA activation allows overcoming effort costs through a mechanism that  
396 can be distinguished from that of incentive motivation, which involves both D<sub>1</sub>R and D<sub>2</sub>R.

397 Delay-discounting and impulsivity — the tendency associated with excessive delay-  
398 discounting — are also thought to be linked to the DA system [53, 54]. Systemic administration of  
399 D<sub>1</sub>R or D<sub>2</sub>R antagonist increases preference for immediate small rewards, rather than larger and  
400 delayed rewards [23, 25, 55, 56]. Concurrently, some of these studies also showed negative effects of  
401 D<sub>1</sub>R [25] or D<sub>2</sub>R blockade [56] on impulsivity. These inconsistencies may be attributed to the  
402 differences in behavioral paradigms or drugs (and doses) used. Our PET-assessed DAR manipulation  
403 demonstrated that blockade of D<sub>1</sub>R and D<sub>2</sub>R at the same occupancy level (~50% and ~80%) similarly  
404 increased delay-discounting (Fig 4F), suggesting that DA transmission continuously adjusts delay-  
405 discounting at the post-synaptic site. This observation is in good accord with the previous finding that  
406 increasing DA transmission decreases temporal discounting; e.g., amphetamine or methylphenidate

407 increased the tendency to choose long-delays options for larger rewards [25, 55-58]. In contrast with  
408 workload-discounting, however, the relation with DAR in delay-discounting and incentive-motivation  
409 could not be distinguished, in that both  $D_1R$  and  $D_2R$  might be involved. This is reminiscent of  
410 neurophysiological data, revealing that DA neurons show a strong sensitivity to both reward and delay,  
411 but a weaker sensitivity to effort [8, 59, 60]. Altogether, this is in line with the notion that the DA  
412 system does not process upcoming benefits (information about potential benefits, including their  
413 distribution in space and time) in the same way it processes upcoming costs (here defined as energy  
414 expenditure) [9].

415         This differential relation between DA and delay vs workload might be related to the  
416 differential expression of these receptors in the direct vs indirect striatopallidal pathway, where the  
417 striatal neurons exclusively express  $D_1R$  and  $D_2R$ , respectively [61]. Opposing functions between  
418 these pathways have been proposed: activity of the direct pathway ( $D_1R$ ) neurons reflects positive  
419 rewarding events promoting movement, whereas activity of the indirect pathway ( $D_2R$ ) neurons is  
420 related to negative values mediating aversion or inhibiting movements [44, 62] (but see [63]). DA  
421 increases the excitability of direct-pathway neurons, and this effect was reduced by  $D_1R$  antagonism,  
422 decreasing motor output. DA reduces the responsiveness of indirect pathway neurons via  $D_2R$  [61],  
423 and blockade of  $D_2R$  would increase the activity, reducing motor output via decreased thalamocortical  
424 drive [64]. This scenario may explain our finding of a synergistic effect of simultaneous  $D_1R$  and  $D_2R$



425 blockade on delay-discounting (*cf.* Fig 5). Further work would be necessary to clarify this hypothesis,  
426 including the dynamic relation with tonic vs phasic DA release, but altogether, these data strongly  
427 support the idea that the distinct contribution of the DA system to benefits (reward availability) and  
428 costs (energy expenditure) involves a complementary action of the direct and indirect pathways.

429

#### 430 *Limitations of the current study*

431 Finally, the limitations of the current study and areas for further research can be discussed. First,  
432 because of applying systemic antagonist administration, the current study could not determine which  
433 brain area(s) is responsible for antagonist-induced alterations of benefit- and cost-based motivation.  
434 While our data support the idea that differential neural networks involve workload- and delay-  
435 discounting, further study (e.g., local infusion of DA antagonist) is needed to identify the locus of the  
436 effects, generalizing our findings to unravel the circuit and molecular mechanism of motivation. We  
437 should also note that the current study does not address dynamic learning paradigms and therefore  
438 does not generalize our findings to the function of the DA system in learning directly. Despite these  
439 limitations, the current study provides unique insights into the role of the DA system in the  
440 motivational process.

441

#### 442 *Conclusion*

443 In summary, the present study demonstrates an apparent dissociation of the functional role of DA  
444 transmission via D<sub>1</sub>- and D<sub>2</sub>-like receptors in benefit- and cost-based motivational processing. DA  
445 transmissions via D<sub>1</sub>R and D<sub>2</sub>R modulate both the incentive impact of reward size and the negative  
446 influence of delay. By contrast, workload-discounting is regulated exclusively via D<sub>2</sub>R. In addition,  
447 D<sub>1</sub>R and D<sub>2</sub>R had synergistic effects on delay-discounting but opposite effects on workload-  
448 discounting. These dissociations can be attributed to differential involvement of the direct and indirect  
449 striatofugal pathways in workload- and delay-discounting. Together, our findings add an important  
450 aspect to our current knowledge concerning the role of DA signaling motivation based on the trade-  
451 off between costs and benefits, thus providing an advanced framework for understanding the  
452 pathophysiology of psychiatric disorders.

453

## 454 **Materials and Methods**

### 455 **Ethics statement**

456 All surgical and experimental procedures were approved by the Animal Care and Use Committee of  
457 the National Institutes for Quantum and Radiological Science and Technology (#09-1035), and were  
458 in accordance with the Institute of Laboratory Animal Research *Guide for the Care and Use of*  
459 *Laboratory Animals*.

460

461 **Subjects**

462 A total of nine male adult macaque monkeys (8 Rhesus and 1 Japanese; 4.6-7.7 kg) were used in this  
463 study. Food was available ad libitum, and motivation was controlled by restricting access to fluid to  
464 experimental sessions, when water was delivered as a reward for performing the task. Animals  
465 received water supplementation whenever necessary (e.g., if they could not obtain enough water  
466 through experiments), and they had free access to water whenever testing was interrupted for more  
467 than a week.

468

469 **Drug treatment**

470 All experiments in this study were carried out with injected intramuscular (i.m.) SCH23390 (Sigma-  
471 Aldrich), haloperidol (Dainippon Sumitomo Pharma, Japan), and raclopride (Sigma-Aldrich)  
472 dissolved or diluted in 0.9% saline solution. Animals were pretreated with an injection of SCH23390  
473 (10, 30, 50, or 100  $\mu\text{g}/\text{kg}$ ), haloperidol (10  $\mu\text{g}/\text{kg}$ ), or raclopride (10 or 30  $\mu\text{g}/\text{kg}$ ) 15 min before the  
474 beginning of the behavioral testing or PET scan. In behavioral testing, saline was injected as a vehicle  
475 control by the same procedure as drug treatment. The administered volume was 1 mL across all  
476 experiments with each monkey.

477

478 **PET procedure and occupancy measurement**

479 Four monkeys were used in the measurement. PET measurements were performed with two PET  
480 ligands: [<sup>11</sup>C]SCH23390 (for studying D<sub>1</sub>R binding) and [<sup>11</sup>C]raclopride (for studying D<sub>2</sub>R binding).  
481 The injected radioactivities of [<sup>11</sup>C]SCH23390 and [<sup>11</sup>C]raclopride were  $91.7 \pm 6.0$  MBq (mean  $\pm$  SD)  
482 and  $87.0 \pm 4.9$  MBq, respectively. Specific radioactivities of [<sup>11</sup>C]SCH23390 and [<sup>11</sup>C]raclopride at  
483 the time of injection were  $86.2 \pm 40.6$  GBq/ $\mu$ mol and  $138.2 \pm 70.1$  GBq/ $\mu$ mol, respectively. All PET  
484 scans were performed using an SHR-7700 PET scanner (Hamamatsu Photonics Inc., Japan) under  
485 conscious conditions and seated in a chair. Prior to the PET study, the monkeys underwent surgery to  
486 implant a head-hold device using aseptic techniques [65]. After transmission scans for attenuation  
487 correction using a <sup>68</sup>Ge–<sup>68</sup>Ga source, a dynamic scan in three-dimensional (3D) acquisition mode was  
488 performed for 60 min ([<sup>11</sup>C]SCH23390) or 90 min ([<sup>11</sup>C]raclopride). The ligands were injected via  
489 crural vein as a single bolus at the start of the scan. All emission data were reconstructed with a 4.0-  
490 mm Colsher filter. Tissue radioactive concentrations were obtained from volumes of interest (VOIs)  
491 placed on several brain regions where DARs are relatively abundant: caudate nucleus, putamen,  
492 nucleus accumbens (NAcc), thalamus, hippocampus, amygdala, parietal cortex, principal sulcus (PS),  
493 dorsolateral prefrontal cortex (dlPFC), and ventrolateral prefrontal cortex (vlPFC), as well as the  
494 cerebellum (as reference region). Each VOI was defined on individual T1-weighted axial magnetic  
495 resonance (MR) images (EXCELART/VG Pianissimo at 1.0 tesla, Toshiba, Japan) that were co-  
496 registered with PET images using PMOD® image analysis software (PMOD Technologies Ltd,

497 Switzerland). Regional radioactivity of each VOI was calculated for each frame and plotted against  
498 time. Regional binding potentials relative to non-displaceable radioligands ( $BP_{ND}$ ) of  $D_1R$  and  $D_2R$   
499 were estimated with a simplified reference tissue model on VOI and voxel-by-voxel bases [66-68].  
500 The monkeys were scanned with and without drug-treatment condition on different days.

501 Occupancy levels were determined from the degree of reduction (%) of  $BP_{ND}$  by antagonists [69].  
502 DA receptor occupancy was estimated as follows:

$$503 \quad \text{Occupancy}(\%) = (1 - BP_{ND\text{Treatment}}/BP_{ND\text{Baseline}}) \times 100 \quad (3),$$

504 where  $BP_{ND\text{Baseline}}$  and  $BP_{ND\text{Treatment}}$  are  $BP_{ND}$  measured without (baseline) and with an antagonist,  
505 respectively. Relationship between  $D_1R$  occupancy ( $D_1\text{Occ}$ ) and dose of SCH23390 (Dose) was  
506 estimated with 50% effective dose ( $ED_{50}$ ) as follows:

$$507 \quad D_1\text{Occ}(\%) = 100 \times \text{Dose}/(ED_{50} + \text{Dose}) \quad (4).$$

508 Relationship between  $D_2R$  occupancy ( $D_2\text{Occ}$ ) and days after haloperidol injection was estimated  
509 using the level at day 0 with a decay constant ( $\lambda$ ) as follows:

$$510 \quad D_2\text{Occ}(\%) = \text{Occ}_{\text{Day}0} e^{-\lambda\text{Day}} \quad (5).$$

511

## 512 Behavioral tasks and testing procedures

513 Three monkeys (ST, 6.4 kg; KN, 6.3 kg; M7, 7.3 kg) were used for the behavioral study. For all  
514 behavioral training and testing, each monkey sat in a primate chair inside a sound-attenuated dark

515 room. Visual stimuli were presented on a computer video monitor in front of the monkey. Behavioral  
516 control and data acquisition were performed using the REX program. Neurobehavioral Systems  
517 Presentation software was used to display visual stimuli (Neurobehavioral Systems). We used two  
518 types of behavioral tasks, *reward-size task* and *work/delay task*, as described previously [2, 43]. Both  
519 tasks consisted of color discrimination trials (see Figs 2A and 4A). Each trial began when the monkey  
520 touched a bar mounted at the front of the chair. The monkey was required to release the bar between  
521 200 and 1,000 ms after a red spot (wait signal) turned green (go signal). On correctly performed trials,  
522 the spot then turned blue (correct signal). A visual cue was presented at the beginning of each color  
523 discrimination trial (500 ms before the red spot appearing).

524 In the reward-size task, a reward of 1, 2, 4, or 8 drops of water (1 drop = ~0.1 mL) was delivered  
525 immediately after the blue signal. Each reward size was selected randomly with equal probability. The  
526 visual cue presented at the beginning of the trial indicated the number of drops for the reward (Fig  
527 2A).

528 In the work/delay task, a water reward (~0.25 mL) was delivered after each correct signal  
529 immediately or after an additional 1 or 2 instrumental trials (work trial), or after a delay period (delay  
530 trials). The visual cue indicated the combination of the trial type and requirement to obtain a reward  
531 (Fig 4A). Pattern cues indicated the delay trials with the timing of reward delivery after a correct  
532 performance: either immediately (0.3 s, 0.2 – 0.4 s; mean, range), a short delay (3.6 s, 3.0 – 4.2 s), or

533 a long delay (7.2 s, 6.0 – 8.4 s). Grayscale cues indicated work trials with the number of trials the  
534 monkey would have to perform to obtain a reward. We set the delay durations to be equivalent to the  
535 duration for 1 or 2 trials of color discrimination trials, so that we could directly compare the cost of 1  
536 or 2 arbitrary units (cost unit; CU).

537 If the monkey released the bar before the green target appeared or within 200 ms after the green  
538 target appeared or failed to respond within 1 s after the green target appeared, we regarded the trial as  
539 a “refusal trial”; all visual stimuli disappeared, the trial was terminated immediately, and after the 1-s  
540 inter-trial interval, the trial was repeated. Our behavioral measurement for the motivational value of  
541 outcome was the proportion of refusal trials. Before each testing session, the monkeys were subject to  
542 ~22 hours of water restriction in their home cage. Each session continued until the monkey would no  
543 longer initiate a new trial (usually less than 100 min).

544 Before this experiment, all monkeys had been trained to perform color discrimination trials in the  
545 cued multi-trial reward schedule task for more than 3 months. The monkeys were tested with the  
546 work/delay task for 1-2 daily sessions as training to become familiar with the cueing condition.

547 Each monkey was tested from Monday to Friday. Treatment with SCH23390 was performed  
548 every four or five days. On other days without SCH23390, sessions with saline (1 mL) treatment were  
549 analyzed as control sessions. Haloperidol was given every two or three weeks on Monday or Tuesday,  
550 because D<sub>2</sub>R occupancy persisted for several days after a single dose of haloperidol treatment (Fig

551 1D). The days before haloperidol treatment were analyzed as control sessions. Each dose of  
552 SCH23390 or a single dose of haloperidol was tested 4 or 5 times per each animal.

553

#### 554 **Sucrose preference test**

555 Two monkeys (RO, 5.8kg; KY, 5.6kg) were used for the sucrose preference test. The test was  
556 performed in their home cages once a week. In advance of the test, water access was prevented for 22

557 h. The monkeys were injected with SCH23390 (30  $\mu\text{g}/\text{kg}$ ), haloperidol (10  $\mu\text{g}/\text{kg}$ ), or saline 15 min

558 before the sucrose preference test. Two bottles containing either 1.5% sucrose solution or tap water

559 were set into bottle holders in the home cage and the monkeys were allowed to freely consume fluids

560 for 2h. The total amount of sucrose (SW) and tap water (TW) intake was measured and calculated as

561 sucrose preference index (SP) as follows:  $SP = (SW - TW) / (SW + TW)$ . The position of sucrose and

562 tap water bottles (right or left toward the front panel of the home cage) was counterbalanced across

563 sessions and monkeys. Drugs or saline was injected alternatively once a week. We also measured the

564 osmolality level in blood samples (1 mL) obtained immediately before and after each testing session.

565

#### 566 **Behavioral data analysis**

567 All data and statistical analyses were performed using the R statistical computing environment (R

568 Development Core Team, 2004). The average error rate for each trial type was calculated for each



569 daily session, with the error rates in each trial type being defined as the number of error trials divided  
570 by the total number of trials of that given type. The monkeys sometimes made many errors at the  
571 beginning of the daily session, probably due to high motivation/impatience; we excluded the data until  
572 the 1st successful trial in these cases. A trial was considered an error trial if the monkey released the  
573 bar either before or within 200 ms after the appearance of the green target (early release) or failed to  
574 respond within 1 s after the green target (late release). We did not distinguish between the two types  
575 of errors and used their sum except for the error pattern analysis. We performed repeated-measures  
576 ANOVAs to test the effect of treatment  $\times$  reward size (for the data in reward-size task) or treatment  $\times$   
577 cost type  $\times$  remaining cost (for the data in work/delay task) on error rate, on late release rate (i.e., error  
578 pattern), on reaction time, and on movements during the delay.

579 We used the refusal rates to estimate the level of motivation because the refusal rates of these  
580 tasks ( $E$ ) are inversely related to the value for action [2]. In the reward-size task, we used the inverse  
581 function (Eq. 1). We fitted the data to linear mixed models [70], in which the random effects across  
582 DAR blockade conditions on parameter  $a$  and/or intercept  $e$  (Fig 2C) were nested. Model selection  
583 was based on Akaike's information criterion (AIC), an estimator of in-sample prediction error for the  
584 nested models (S1 Table). Using the selected model, the parameter  $a$  was estimated individually, and  
585 then normalized by the value in non-treated condition (CON) (Fig 3A and 3B).

586 In the work/delay task, we used linear models to estimate the effect of remaining cost, i.e.,  
587 workloads and delay, as described previously [43],

$$588 \quad E_w = k_w CU + E_0 \quad (6),$$

$$589 \quad E_d = k_d CU + E_0 \quad (7),$$

590 where  $E_w$  and  $E_d$  are the error rates, and  $k_w$  and  $k_d$  are cost factors for work and delay trials, respectively.  
591  $CU$  is the number of remaining cost units, and  $E_0$  is the intercept. We simultaneously fitted a pair of  
592 these linear models to the data by sum-of-squares minimization without weighting. The coefficient of  
593 determination ( $R^2$ ) was reported as a measure of goodness of fit.

594

#### 595 **Acknowledgements**

596 We thank R. Suma, T. Okauchi, Y. Sugii, R. Yamaguchi, Y. Matsuda, and J. Kamei for their technical  
597 assistance, and K. Oyama for discussion. We also thank to Dr. M-R. Zhang and his colleagues at  
598 Department of Radiopharmaceuticals Development, NIRS/QST for producing the radioligands. A  
599 Japanese monkey used in this study was provided by National Bio-Resource Project "Japanese  
600 Monkeys" of the MEXT, Japan.

601

#### 602 **References**

- 603 1. Berridge KC. Motivation concepts in behavioral neuroscience. *Physiol Behav.* 2004;81(2):179-  
604 209. doi: 10.1016/j.physbeh.2004.02.004.
- 605 2. Minamimoto T, La Camera G, Richmond BJ. Measuring and modeling the interaction among  
606 reward size, delay to reward, and satiation level on motivation in monkeys. *J Neurophysiol.*  
607 2009;101(1):437-47. doi: 10.1152/jn.90959.2008.
- 608 3. Zahrt J, Taylor JR, Mathew RG, Arnsten AF. Supranormal stimulation of D1 dopamine receptors  
609 in the rodent prefrontal cortex impairs spatial working memory performance. *J Neurosci.*  
610 1997;17(21):8528-35. doi: 10.1523/jneurosci.17-21-08528.
- 611 4. Fiorillo CD, Tobler PN, Schultz W. Discrete coding of reward probability and uncertainty by  
612 dopamine neurons. *Science.* 2003;299(5614):1898-902. doi: 10.1126/science.1077349.
- 613 5. Kobayashi S, Schultz W. Influence of reward delays on responses of dopamine neurons. *J Neurosci.*  
614 2008;28(31):7837-46. doi: 10.1523/jneurosci.1600-08.2008.
- 615 6. Ravel S, Richmond BJ. Dopamine neuronal responses in monkeys performing visually cued  
616 reward schedules. *Eur J Neurosci.* 2006;24(1):277-90. doi: 10.1111/j.1460-9568.2006.04905.x.
- 617 7. Tobler PN, Fiorillo CD, Schultz W. Adaptive coding of reward value by dopamine neurons.  
618 *Science.* 2005;307(5715):1642-5. doi: 10.1126/science.

- 619 8. Varazzani C, San-Galli A, Gilardeau S, Bouret S. Noradrenaline and Dopamine Neurons in the  
620 Reward/Effort Trade-Off: A Direct Electrophysiological Comparison in Behaving Monkeys. *J*  
621 *Neurosci.* 2015;35(20):7866-77. doi: 10.1523/jneurosci.0454-15.2015.
- 622 9. Walton ME, Bouret S. What Is the Relationship between Dopamine and Effort? *Trends Neurosci.*  
623 2019;42(2):79-91. doi: 10.1016/j.tins.2018.10.001.
- 624 10. Cools R, Nakamura K, Daw ND. Serotonin and dopamine: unifying affective, activational, and  
625 decision functions. *Neuropsychopharmacology.* 2011;36(1):98-113. doi: 10.1038/npp.2010.121.
- 626 11. Niv Y, Joel D, Dayan P. A normative perspective on motivation. *Trends Cogn Sci.*  
627 2006;10(8):375-81. doi: 10.1016/j.tics.2006.06.010.
- 628 12. Berridge KC. The debate over dopamine's role in reward: the case for incentive salience.  
629 *Psychopharmacology (Berl).* 2007;191(3):391-431. doi: 10.1007/s00213-006-0578-x.
- 630 13. Le Bouc R, Rigoux L, Schmidt L, Degos B, Welter ML, Vidailhet M, et al. Computational  
631 Dissection of Dopamine Motor and Motivational Functions in Humans. *J Neurosci.*  
632 2016;36(25):6623-33. doi: 10.1523/jneurosci.3078-15.2016.
- 633 14. Muhammed K, Manohar S, Ben Yehuda M, Chong TT, Tofaris G, Lennox G, et al. Reward  
634 sensitivity deficits modulated by dopamine are associated with apathy in Parkinson's disease. *Brain.*  
635 2016;139(Pt 10):2706-21. doi: 10.1093/brain/aww188.

- 636 15. Salamone JD, Correa M. Motivational views of reinforcement: implications for understanding the  
637 behavioral functions of nucleus accumbens dopamine. *Behav Brain Res.* 2002;137(1-2):3-25. doi:  
638 10.1016/s0166-4328(02)00282-6.
- 639 16. Walton ME, Kennerley SW, Bannerman DM, Phillips PE, Rushworth MF. Weighing up the  
640 benefits of work: behavioral and neural analyses of effort-related decision making. *Neural Netw.*  
641 2006;19(8):1302-14. doi: 10.1016/j.neunet.2006.03.005.
- 642 17. Buyukdura JS, McClintock SM, Croarkin PE. Psychomotor retardation in depression: Biological  
643 underpinnings, measurement, and treatment. *Prog Neuro-Psychoph.* 2011;35(2):395-409. doi:  
644 10.1016/j.pnpbp.2010.10.019.
- 645 18. Demyttenaere K, De Fruyt J, Stahl SM. The many faces of fatigue in major depressive disorder.  
646 *Int J Neuropsychoph.* 2005;8(1):93-105. doi: 10.1017/S1461145704004729.
- 647 19. Salamone JD, Yohn SE, Lopez-Cruz L, San Miguel N, Correa M. Activational and effort-related  
648 aspects of motivation: neural mechanisms and implications for psychopathology. *Brain.*  
649 2016;139(Pt 5):1325-47. doi: 10.1093/brain/aww050.
- 650 20. Choi WY, Morvan C, Balsam PD, Horvitz JC. Dopamine D1 and D2 Antagonist Effects on  
651 Response Likelihood and Duration. *Behav Neurosci.* 2009;123(6):1279-87.  
652 doi:10.1037/a0017702

- 653 21. Pattij T, Janssen MC, Vanderschuren LJ, Schoffelmeer AN, van Gaalen MM. Involvement of  
654 dopamine D1 and D2 receptors in the nucleus accumbens core and shell in inhibitory response  
655 control. *Psychopharmacology (Berl)*. 2007;191(3):587-98. doi: 10.1007/s00213-006-0533-x.
- 656 22. Bardgett ME, Depenbrock M, Downs N, Points M, Green L. Dopamine Modulates Effort-Based  
657 Decision Making in Rats. *Behav Neurosci*. 2009;123(2):242-51. doi: 10.1037/a0014625.
- 658 23. Denk F, Walton ME, Jennings KA, Sharp T, Rushworth MF, Bannerman DM. Differential  
659 involvement of serotonin and dopamine systems in cost-benefit decisions about delay or effort.  
660 *Psychopharmacology (Berl)*. 2005;179(3):587-96. doi: 10.1007/s00213-004-2059-4.
- 661 24. Salamone JD. Dopamine, effort, and decision making: theoretical comment on Bardgett et al.  
662 (2009). *Behav Neurosci*. 2009;123(2):463-7. doi: 10.1037/a0015381.
- 663 25. Wade TR, de Wit H, Richards JB. Effects of dopaminergic drugs on delayed reward as a measure  
664 of impulsive behavior in rats. *Psychopharmacology*. 2000;150(1):90-101.  
665 doi:10.1007/s002130000402.
- 666 26. Farde L, Nordström A, Wiesel F, Pauli S, Halldin C, Sedvall G. Positron emission tomographic  
667 analysis of central D1 and D2 dopamine receptor occupancy in patients treated with classical  
668 neuroleptics and clozapine. Relation to extrapyramidal side effects. *Archives of general psychiatry*.  
669 1992;49(7):538. doi:10.1001/archpsyc.1992.01820070032005.

- 670 27. Kapur S, Zipursky R, Jones C, Remington G, Houle S. Relationship between dopamine D(2)  
671 occupancy, clinical response, and side effects: a double-blind PET study of first-episode  
672 schizophrenia. *Am J Psychiatry*. 2000;157(4):514-20. doi: 10.1176/appi.ajp.157.4.514.
- 673 28. Takano A, Suhara T, Maeda J, Ando K, Okauchi T, Obayashi S, et al. Relation between cortical  
674 dopamine D(2) receptor occupancy and suppression of conditioned avoidance response in non-  
675 human primate. *Psychiatry Clin Neurosci*. 2004;58(3):330-2. doi: 10.1111/j.1440-  
676 1819.2004.01240.x.
- 677 29. Wadenberg ML, Kapur S, Soliman A, Jones C, Vaccarino F. Dopamine D2 receptor occupancy  
678 predicts catalepsy and the suppression of conditioned avoidance response behavior in rats.  
679 *Psychopharmacology (Berl)*. 2000;150(4):422-9. doi: 10.1007/s002130000466.
- 680 30. Wadenberg ML, Soliman A, VanderSpek SC, Kapur S. Dopamine D(2) receptor occupancy is a  
681 common mechanism underlying animal models of antipsychotics and their clinical effects.  
682 *Neuropsychopharmacology*. 2001;25(5):633-41. doi: 10.1016/S0893-133X(01)00261-5.
- 683 31. Halldin C, Gulyas B, Farde L. PET studies with carbon-11 radioligands in  
684 neuropsychopharmacological drug development. *Curr Pharm Des*. 2001;7(18):1907-29. doi:  
685 10.2174/1381612013396871.

- 686 32. Ishiwata K, Kawamura K, Kobayashi T, Matsuno K. Sigma1 and dopamine D2 receptor occupancy  
687 in the mouse brain after a single administration of haloperidol and two dopamine D2-like receptor  
688 ligands. *Nucl Med Biol.* 2003;30(4):429-34. doi: 10.1016/s0969-8051(03)00003-9.
- 689 33. Nordstrom AL, Farde L, Halldin C. Time course of D2-dopamine receptor occupancy examined  
690 by PET after single oral doses of haloperidol. *Psychopharmacology (Berl).* 1992;106(4):433-8.  
691 doi: 10.1007/bf02244811.
- 692 34. Bouret S, Richmond BJ. Sensitivity of locus ceruleus neurons to reward value for goal-directed  
693 actions. *J Neurosci.* 2015;35(9):4005-14. doi: 10.1523/jneurosci.4553-14.2015.
- 694 35. Eldridge MA, Lerchner W, Saunders RC, Kaneko H, Krausz KW, Gonzalez FJ, et al.  
695 Chemogenetic disconnection of monkey orbitofrontal and rhinal cortex reversibly disrupts reward  
696 value. *Nat Neurosci.* 2016;19(1):37-9. doi: 10.1038/nn.4192.
- 697 36. Fujimoto A, Hori Y, Nagai Y, Kikuchi E, Oyama K, Suhara T, et al. Signaling Incentive and Drive  
698 in the Primate Ventral Pallidum for Motivational Control of Goal-Directed Action. *J Neurosci.*  
699 2019;39(10):1793-804. doi: 10.1523/jneurosci.2399-18.2018.
- 700 37. Nagai YJ, Kikuchi E, Lerchner W, Inoue K, Ji B, Eldridge MAG, et al. PET imaging-guided  
701 chemogenetic silencing reveals a critical role of primate rostromedial caudate in reward evaluation.  
702 *Nat Commun.* 2016;7:13605. doi:10.1038/ncomms13605.



- 703 38. Weed MR, Gold LH. The effects of dopaminergic agents on reaction time in rhesus monkeys.  
704 Psychopharmacology (Berl). 1998;137(1):33-42. doi: 10.1007/s002130050590.
- 705 39. Muller U, von Cramon DY, Pollmann S. D1- versus D2-receptor modulation of visuospatial  
706 working memory in humans. J Neurosci. 1998;18(7):2720-8. doi:10.1523/jneurosci.18-07-02720.
- 707 40. Sawaguchi T, Goldman-Rakic PS. D1 dopamine receptors in prefrontal cortex: involvement in  
708 working memory. Science. 1991;251(4996):947-50. doi: 10.1126/science.1825731.
- 709 41. Salamone JD, Steinpreis RE, McCullough LD, Smith P, Grebel D, Mahan K. Haloperidol and  
710 nucleus accumbens dopamine depletion suppress lever pressing for food but increase free food  
711 consumption in a novel food choice procedure. Psychopharmacology. 1991;104(4):515-21.  
712 doi:10.1007/BF02245659.
- 713 42. Minamimoto T, Yamada H, Hori Y, Suhara T. Hydration level is an internal variable for computing  
714 motivation to obtain water rewards in monkeys. Exp Brain Res. 2012;218(4):609-18. doi:  
715 10.1007/s00221-012-3054-3.
- 716 43. Minamimoto T, Hori Y, Richmond BJ. Is working more costly than waiting in monkeys? PLoS  
717 One. 2012;7(11):e48434. doi: 10.1371/journal.pone.0048434.
- 718 44. Kravitz AV, Freeze BS, Parker PRL, Kay K, Thwin MT, Deisseroth K, et al. Regulation of  
719 parkinsonian motor behaviours by optogenetic control of basal ganglia circuitry. Nature.  
720 2010;466(7306):622-U7. doi: 10.1038/nature09159.

- 721 45. Simmons JM, Minamimoto T, Murray EA, Richmond BJ. Selective ablations reveal that orbital  
722 and lateral prefrontal cortex play different roles in estimating predicted reward value. *J Neurosci.*  
723 2010;30(47):15878-87. doi:10.1523/jneurosci.1802-10.2010.
- 724 46. Callicott JH, Mattay VS, Bertolino A, Finn K, Coppola R, Frank JA, et al. Physiological  
725 characteristics of capacity constraints in working memory as revealed by functional MRI. *Cereb*  
726 *Cortex.* 1999;9(1):20-6. doi:10.1093/cercor/9.1.20.
- 727 47. Vijayraghavan S, Wang M, Birnbaum SG, Williams GV, Arnsten AFT. Inverted-U dopamine D1  
728 receptor actions on prefrontal neurons engaged in working memory. *Nat Neurosci.*  
729 2007;10(3):376-84. doi:10.1038/nn1846.
- 730 48. Richfield EK, Penney JB, Young AB. Anatomical and affinity state comparisons between  
731 dopamine D1 and D2 receptors in the rat central nervous system. *Neuroscience.* 1989;30(3):767-  
732 77. doi: 10.1016/0306-4522(89)90168-1.
- 733 49. Dreyer JK, Herrik KF, Berg RW, Hounsgaard JD. Influence of Phasic and Tonic Dopamine  
734 Release on Receptor Activation. *J Neurosci.* 2010;30(42):14273-83. doi: 10.1523/jneurosci.1894-  
735 10.2010.
- 736 50. Pardo M, Lopez-Cruz L, San Miguel N, Salamone JD, Correa M. Selection of sucrose  
737 concentration depends on the effort required to obtain it: studies using tetrabenazine, D1, D2, and

- 738 D3 receptor antagonists. *Psychopharmacology (Berl)*. 2015;232(13):2377-91. doi:  
739 10.1007/s00213-015-3872-7.
- 740 51. Von Huben SN, Davis SA, Lay CC, Katner SN, Crean RD, Taffe MA. Differential contributions  
741 of dopaminergic D1- and D2-like receptors to cognitive function in rhesus monkeys.  
742 *Psychopharmacology (Berl)*. 2006;188(4):586-96. doi: 10.1007/s00213-006-0347-x.
- 743 52. Wang S, Hu SH, Shi Y, Li BM. The roles of the anterior cingulate cortex and its dopamine  
744 receptors in self-paced cost-benefit decision making in rats. *Learn Behav*. 2017;45(1):89-99. doi:  
745 10.3758/s13420-016-0243-0.
- 746 53. Joutsa J, Voon V, Johansson J, Niemela S, Bergman J, Kaasinen V. Dopaminergic function and  
747 intertemporal choice. *Transl Psychiatry*. 2015;5:e491. doi: 10.1038/tp.2014.133.
- 748 54. Pine A, Shiner T, Seymour B, Dolan RJ. Dopamine, time, and impulsivity in humans. *J Neurosci*.  
749 2010;30(26):8888-96. doi: 10.1523/jneurosci.6028-09.2010.
- 750 55. Cardinal RN, Robbins TW, Everitt BJ. The effects of d-amphetamine, chlordiazepoxide, alpha-  
751 flupenthixol and behavioural manipulations on choice of signalled and unsignalled delayed  
752 reinforcement in rats. *Psychopharmacology*. 2000;152(4):362-75. doi:10.1007/s002130000536.
- 753 56. van Gaalen MM, van Koten R, Schoffelmeer ANM, Vanderschuren LJMJ. Critical involvement  
754 of dopaminergic neurotransmission in impulsive decision making. *Biol Psychiat*. 2006;60(1):66-  
755 73. doi: 10.1016/j.biopsych.2005.06.005.

- 756 57. Evenden JL, Ryan CN. The pharmacology of impulsive behaviour in rats: the effects of drugs on  
757 response choice with varying delays of reinforcement. *Psychopharmacology (Berl)*.  
758 1996;128(2):161-70. doi: 10.1007/s002130050121.
- 759 58. Rajala AZ, Jenison RL, Populin LC. Decision making: effects of methylphenidate on temporal  
760 discounting in nonhuman primates. *J Neurophysiol*. 2015;114(1):70-9. doi:  
761 10.1152/jn.00278.2015.
- 762 59. Lak A, Stauffer WR, Schultz W. Dopamine prediction error responses integrate subjective value  
763 from different reward dimensions. *Proc Natl Acad Sci U S A*. 2014;111(6):2343-8. doi:  
764 10.1073/pnas.1321596111.
- 765 60. Pasquereau B, Turner RS. Limited encoding of effort by dopamine neurons in a cost-benefit trade-  
766 off task. *J Neurosci*. 2013;33(19):8288-300. doi: 10.1523/jneurosci.4619-12.2013.
- 767 61. Gerfen CR, Surmeier DJ. Modulation of striatal projection systems by dopamine. *Annu Rev*  
768 *Neurosci*. 2011;34:441-66. doi: 10.1146/annurev-neuro-061010-113641.
- 769 62. Hikida T, Kimura K, Wada N, Funabiki K, Nakanishi S. Distinct roles of synaptic transmission in  
770 direct and indirect striatal pathways to reward and aversive behavior. *Neuron*. 2010;66(6):896-  
771 907. doi: 10.1016/j.neuron.2010.05.011.

- 772 63. Kupchik YM, Brown RM, Heinsbroek JA, Lobo MK, Schwartz DJ, Kalivas PW. Coding the  
773 direct/indirect pathways by D1 and D2 receptors is not valid for accumbens projections. *Nat*  
774 *Neurosci.* 2015;18(9):1230-2. doi: 10.1038/nn.4068.
- 775 64. Lee B, Groman S, London ED, Jentsch JD. Dopamine D2/D3 receptors play a specific role in the  
776 reversal of a learned visual discrimination in monkeys. *Neuropsychopharmacology.*  
777 2007;32(10):2125-34. doi: 10.1038/sj.npp.1301337.
- 778 65. Nagai Y, Minamimoto T, Ando K, Obayashi S, Ito H, Ito N, et al. Correlation between decreased  
779 motor activity and dopaminergic degeneration in the ventrolateral putamen in monkeys receiving  
780 repeated MPTP administrations: a positron emission tomography study. *Neurosci Res.*  
781 2012;73(1):61-7. doi: 10.1016/j.neures.2012.02.007.
- 782 66. Gunn RN, Lammertsma AA, Hume SP, Cunningham VJ. Parametric imaging of ligand-receptor  
783 binding in PET using a simplified reference region model. *Neuroimage.* 1997;6(4):279-87. doi:  
784 10.1006/nimg.1997.0303.
- 785 67. Jucaite A, Odano I, Olsson H, Pauli S, Halldin C, Farde L. Quantitative analyses of regional  
786 [<sup>11</sup>C]PE2I binding to the dopamine transporter in the human brain: a PET study. *Eur J Nucl Med*  
787 *Mol Imaging.* 2006;33(6):657-68. doi: 10.1007/s00259-005-0027-9.
- 788 68. Lammertsma AA, Hume SP. Simplified reference tissue model for PET receptor studies.  
789 *Neuroimage.* 1996;4(3 Pt 1):153-8. doi: 10.1006/nimg.1996.0066.

- 790 69. Cunningham VJ, Rabiner EA, Slifstein M, Laruelle M, Gunn RN. Measuring drug occupancy in  
791 the absence of a reference region: the Lassen plot re-visited. *J Cereb Blood Flow Metab.*  
792 2010;30(1):46-50. doi: 10.1038/jcbfm.2009.190.
- 793 70. Bates D, Mächler M, Bolker B, Walker S. Fitting Linear Mixed-Effects Models Using lme4.  
794 *Journal of Statistical Software.* 2015;67(1):1-48. doi: 10.18637/jss.v067.i01.

795 **Supporting information**

796 **S1 Table. Model comparison.**  $a(cond)$  and  $e(cond)$  indicate the random effects of DAR blocking  
797 treatment conditions on parameters  $a$  and  $e$ , respectively. AIC (Akaike's information criterion) is a  
798 relative measure of quality for the models (#1-4).  $\Delta AIC$  denotes difference from minimum AIC.

799

800 **S1 Fig. Occupancy estimation.** Example of occupancy estimation based on modified Lassen plot of  
801 [ $^{11}C$ ]SCH23390 PET data obtained from monkey DO. Colored dots represent the relationship between  
802 decreased specific binding [i.e.,  $BP_{ND}(\text{baseline}) - BP_{ND}(\text{blocking})$ ] and baseline [ $BP_{ND}(\text{baseline})$ ]  
803 for each brain region under each blocking condition (indexed by color). Occupancy was determined  
804 as a proportion of reduced specific binding to baseline, which corresponds to the slope of linear  
805 regression. In this case,  $D_1$  occupancy was 80%, 78%, 67%, and 26% for 100, 50, 30 and 10  $\mu\text{g}/\text{kg}$   
806 doses, respectively.

807

808 **S2 Fig. Comparable effects of  $D_2R$  antagonism between raclopride and haloperidol at similar**  
809 **occupancy.** (A) Occupancy of  $D_2R$  measured at striatal ROI is plotted against dose of raclopride. (B)  
810 Error rates as a function of reward size for control (black) and after injection of raclopride (10  $\mu\text{g}/\text{kg}$ ,  
811 i.m, left side) and haloperidol (10  $\mu\text{g}/\text{kg}$ , i.m, right side) in monkey KN are plotted. Dotted curves are  
812 best-fit inverse function (*model #1* in S1 Table).

813

814 **S3 Fig. Effect of D<sub>1</sub>R/D<sub>2</sub>R blockade on reaction time and error pattern.** (A-B) Mean reaction time

815 as function of reward size for control and D<sub>1</sub>R blockade conditions. (C-D) Late release rate (mean ±

816 SEM) as function of reward size for control and D<sub>1</sub>R blockade conditions. (E-H) Same as (A-D), but

817 for D<sub>2</sub>R blockade. Data were obtained from monkey ST.

818

819 **S4 Fig. Little influence of DAR blockades on sucrose preference and blood osmolality.** (A)

820 Sucrose preference index after administration of saline (Control), SCH23390 (30µg/kg, D<sub>1</sub>), and

821 haloperidol (10µg/kg; D<sub>2</sub>, day 0), respectively. (B) Blood osmolality measured in serum samples

822 obtained before (Pre) and after (Post) sucrose test. Filled circles and shades indicate median and raw

823 data points, while horizontal bars indicate SD.



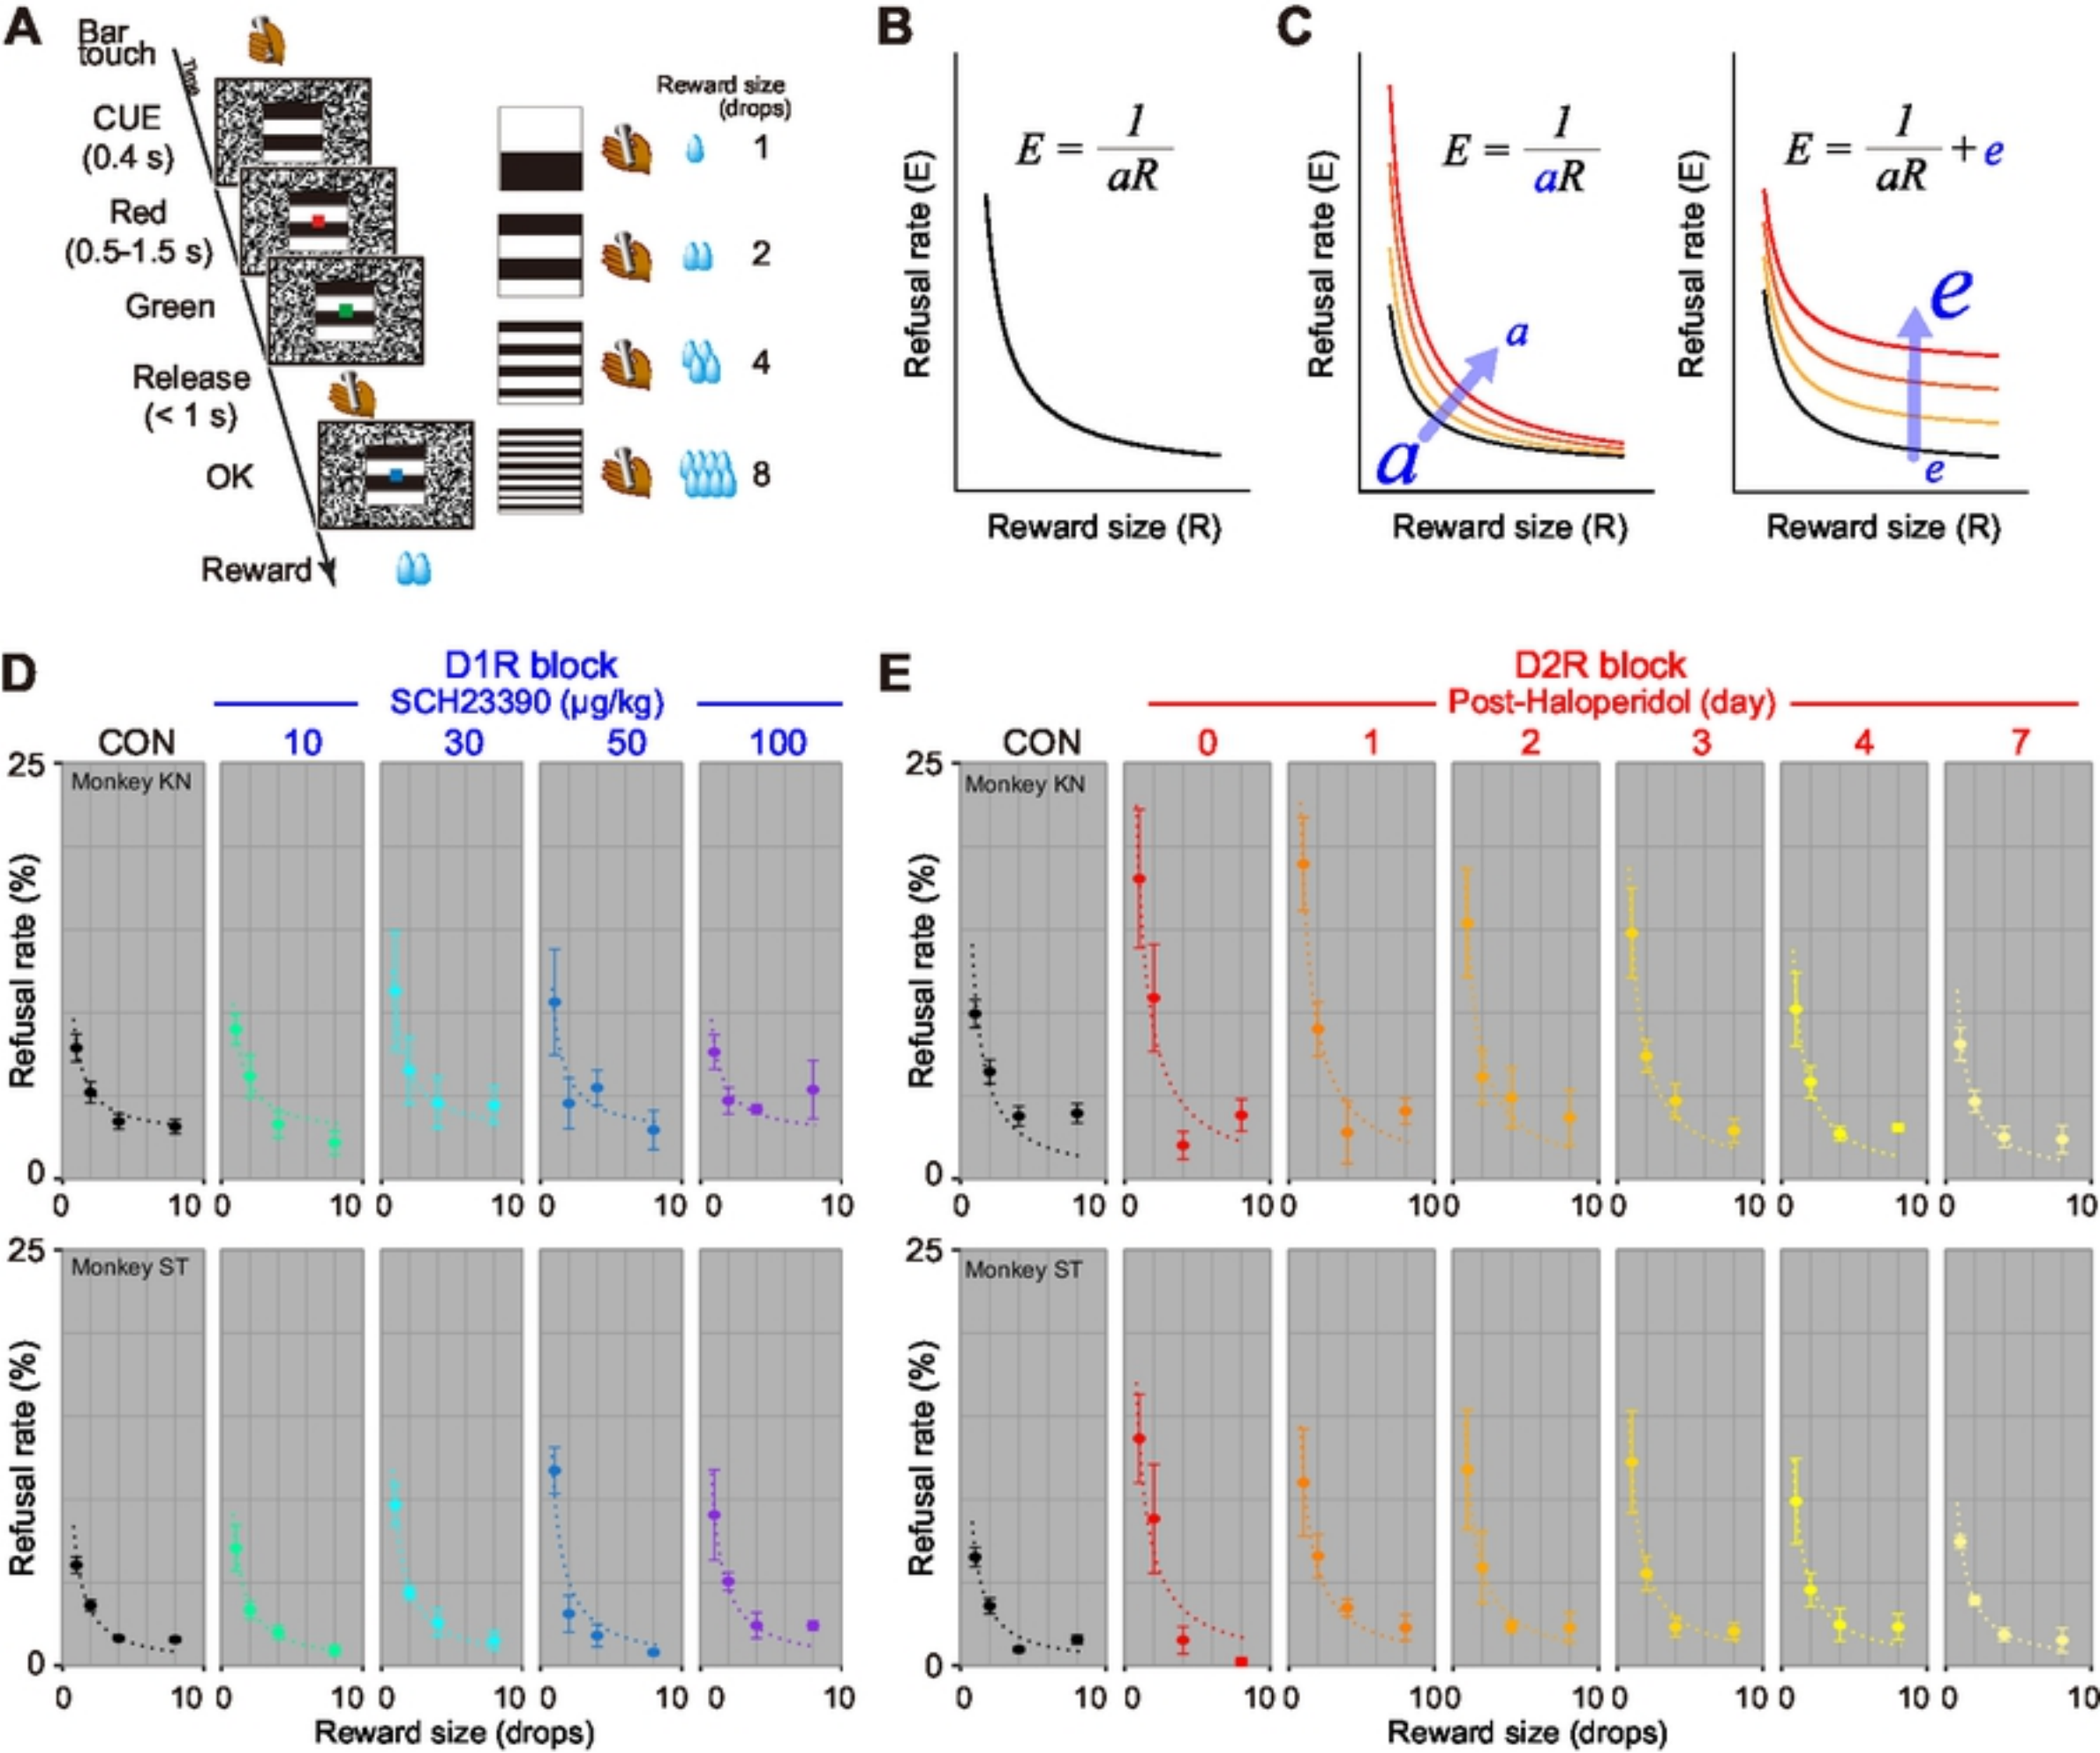

Figure 2

**A****D1R block**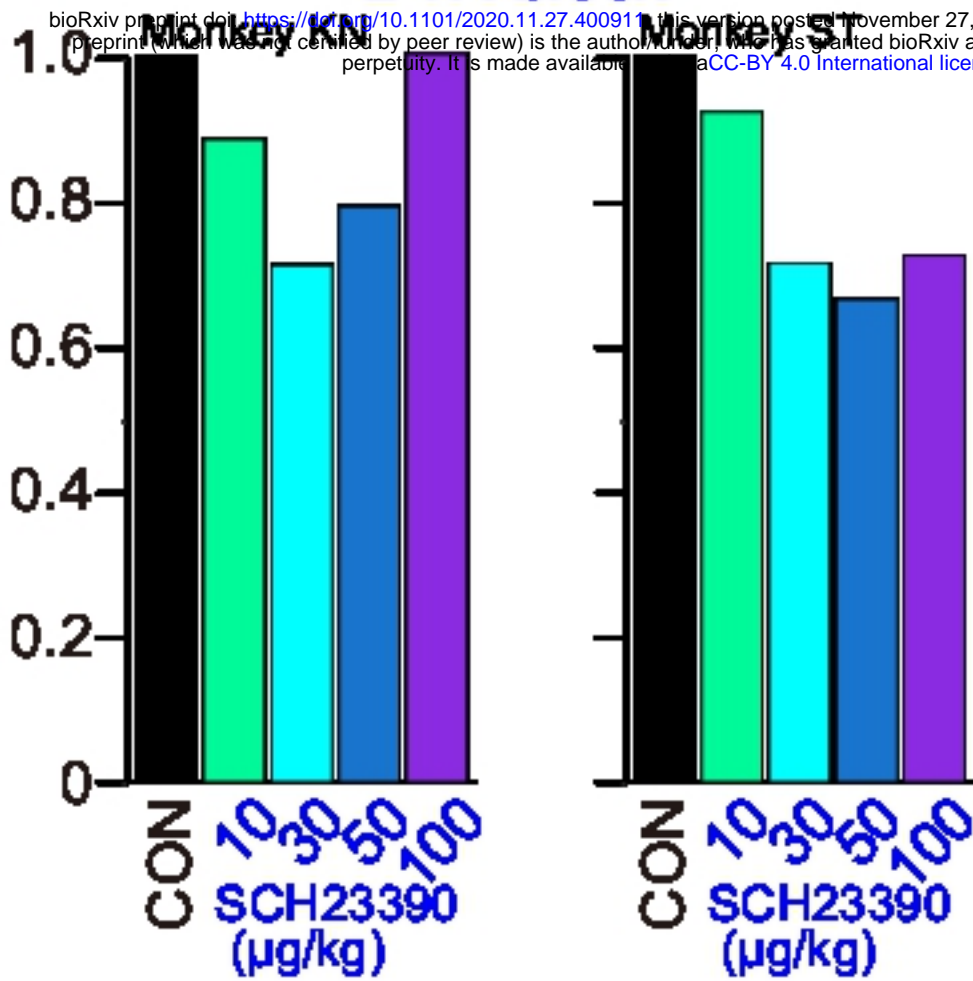**C**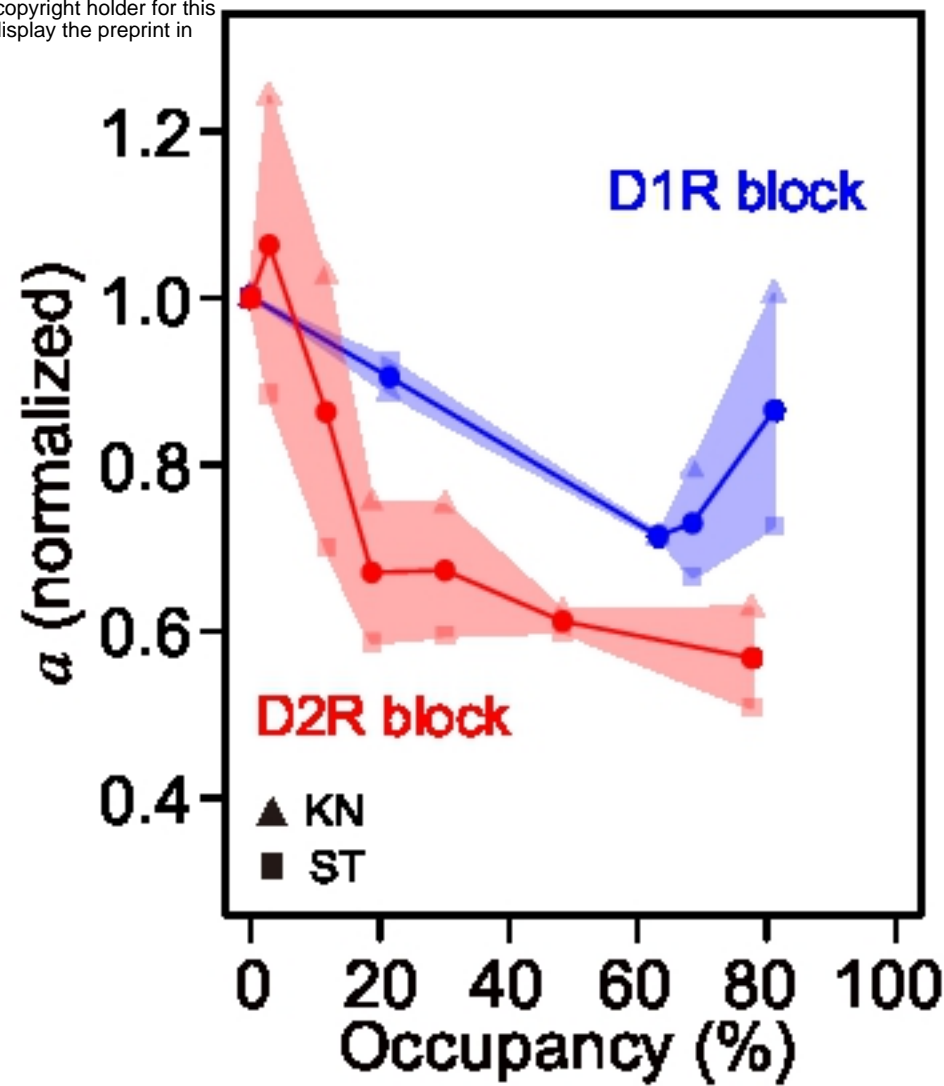**B****D2R block**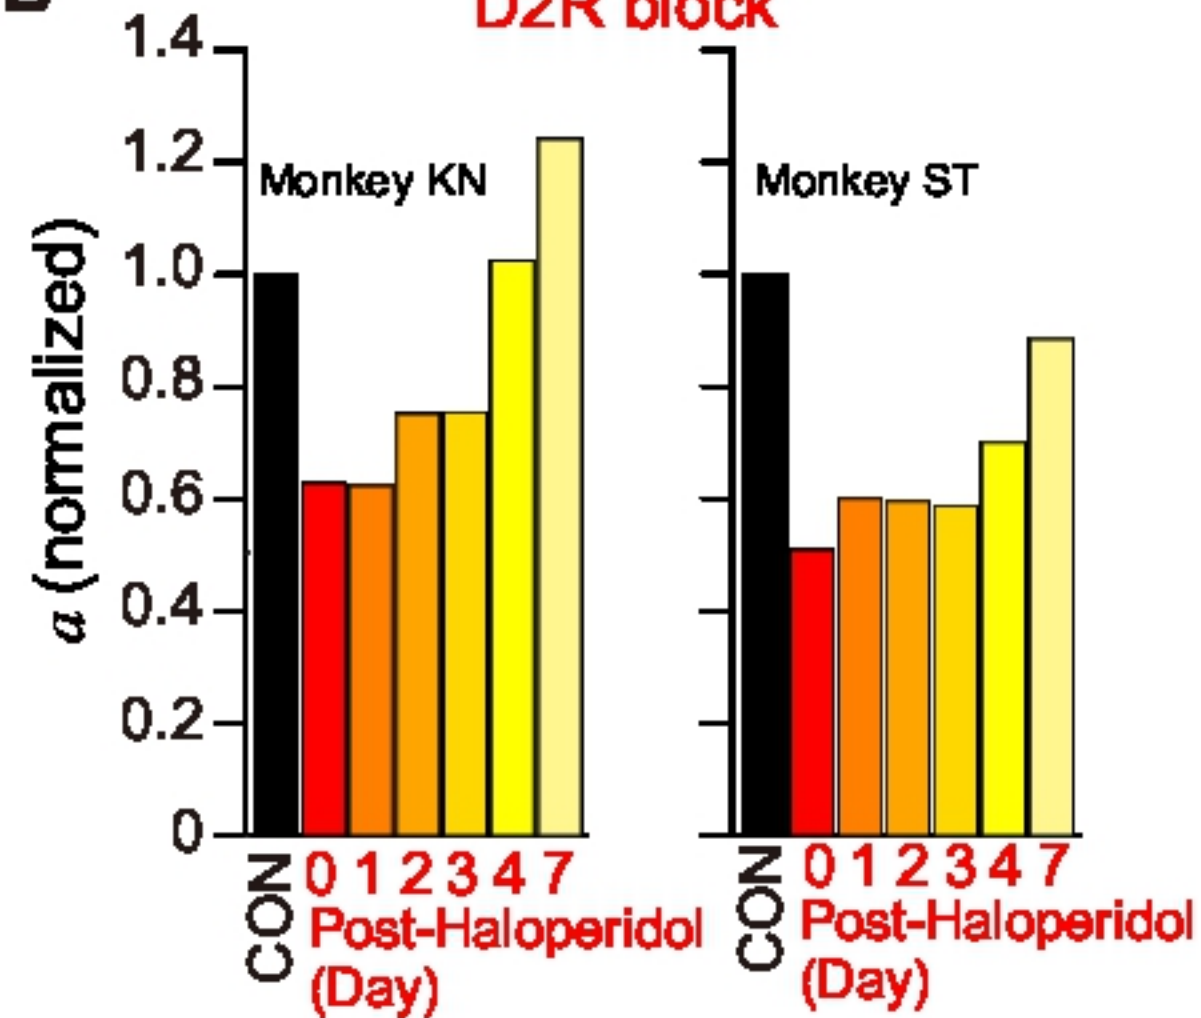

Figure3

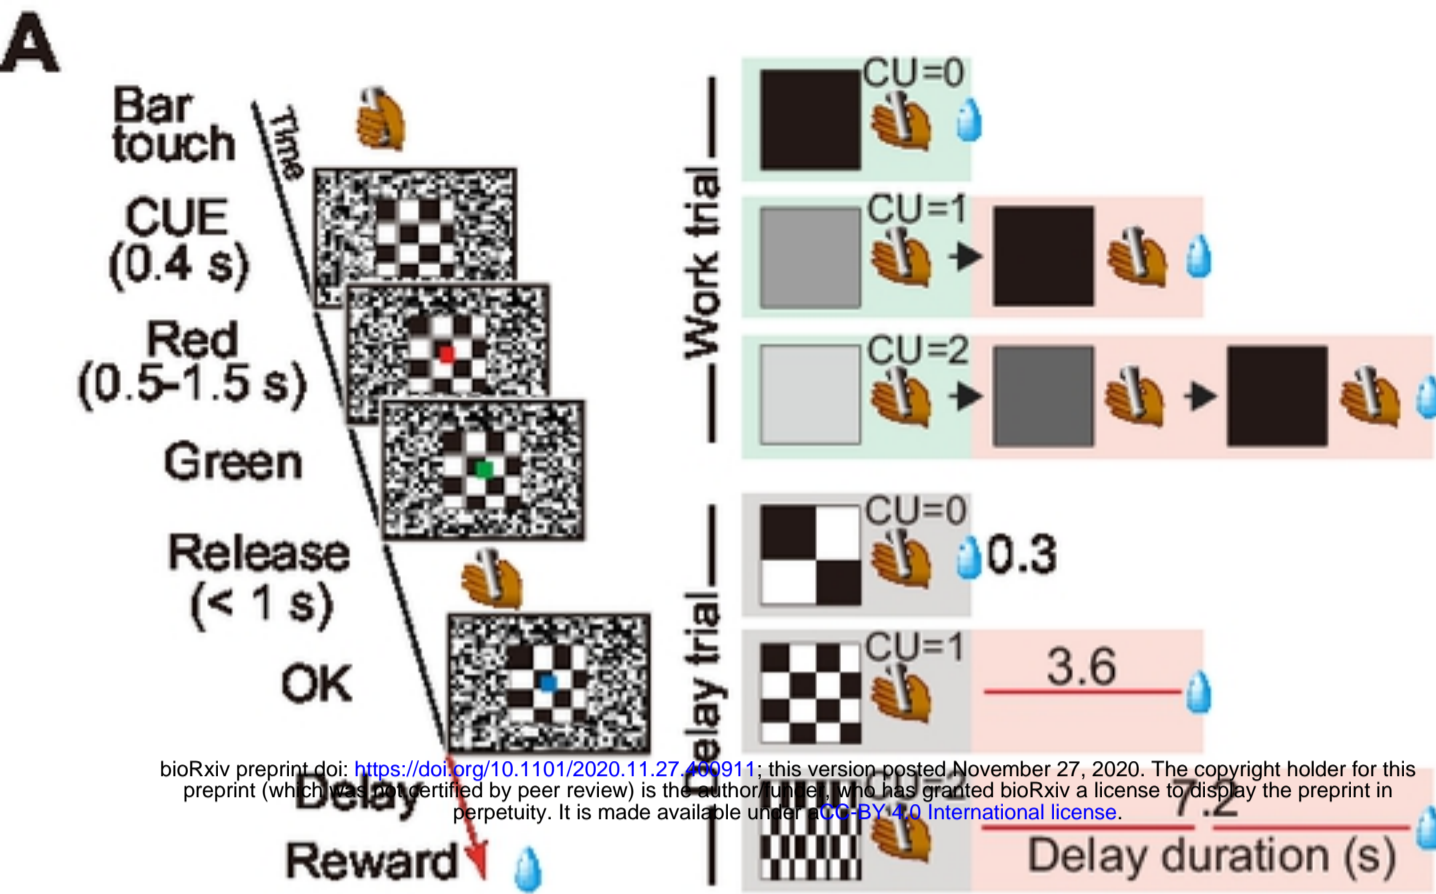

bioRxiv preprint doi: <https://doi.org/10.1101/2020.11.27.409911>; this version posted November 27, 2020. The copyright holder for this preprint (which was not certified by peer review) is the author/funder, who has granted bioRxiv a license to display the preprint in perpetuity. It is made available under aCC-BY 4.0 International license.

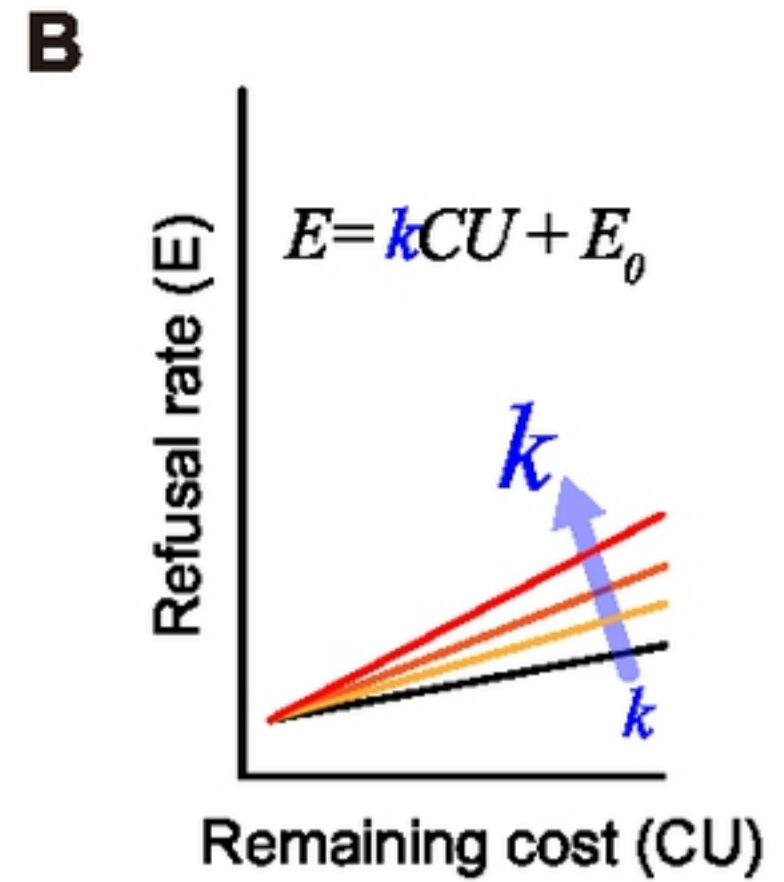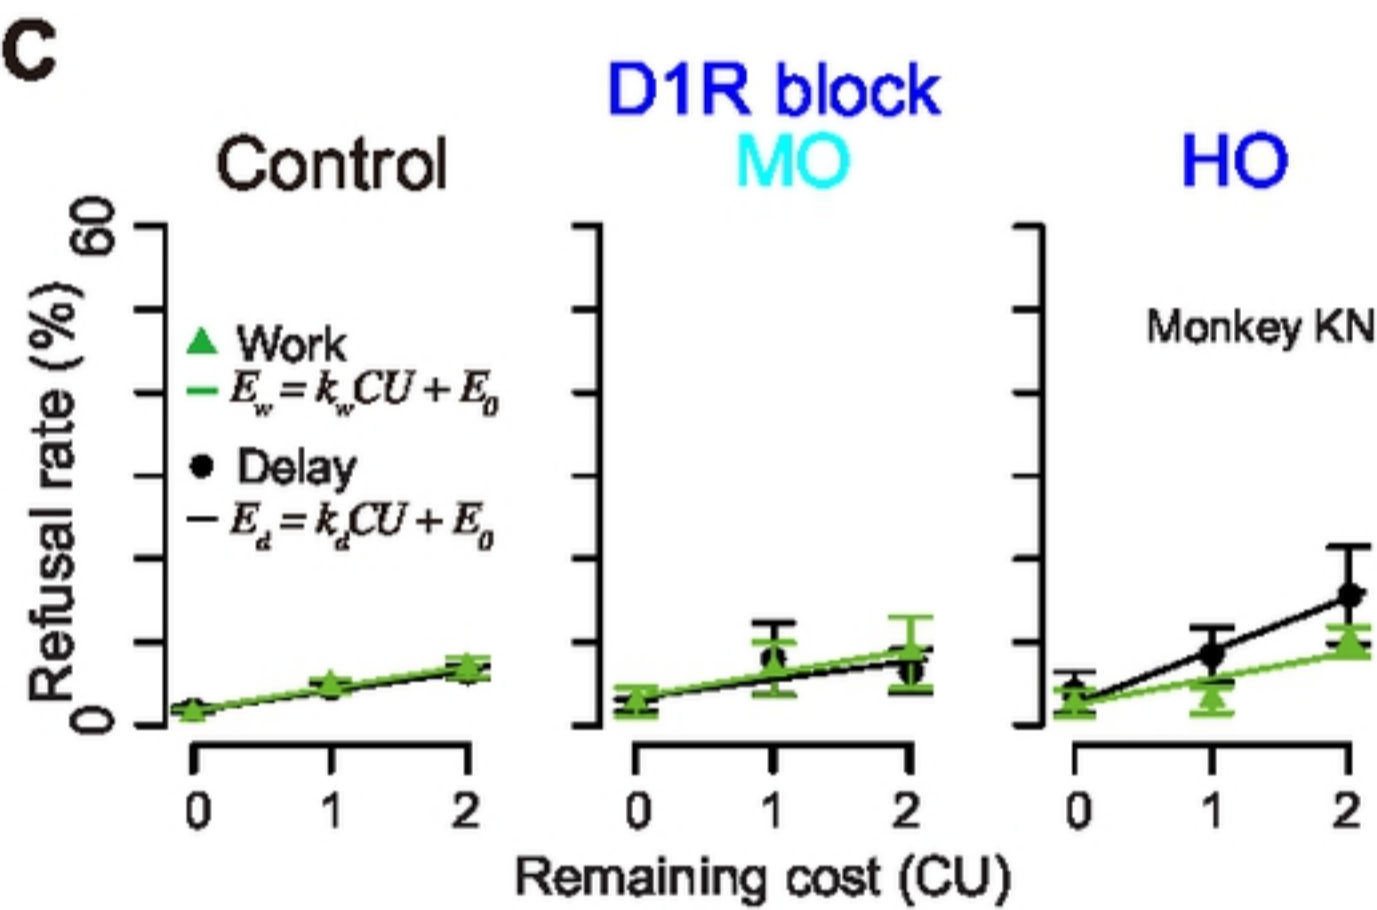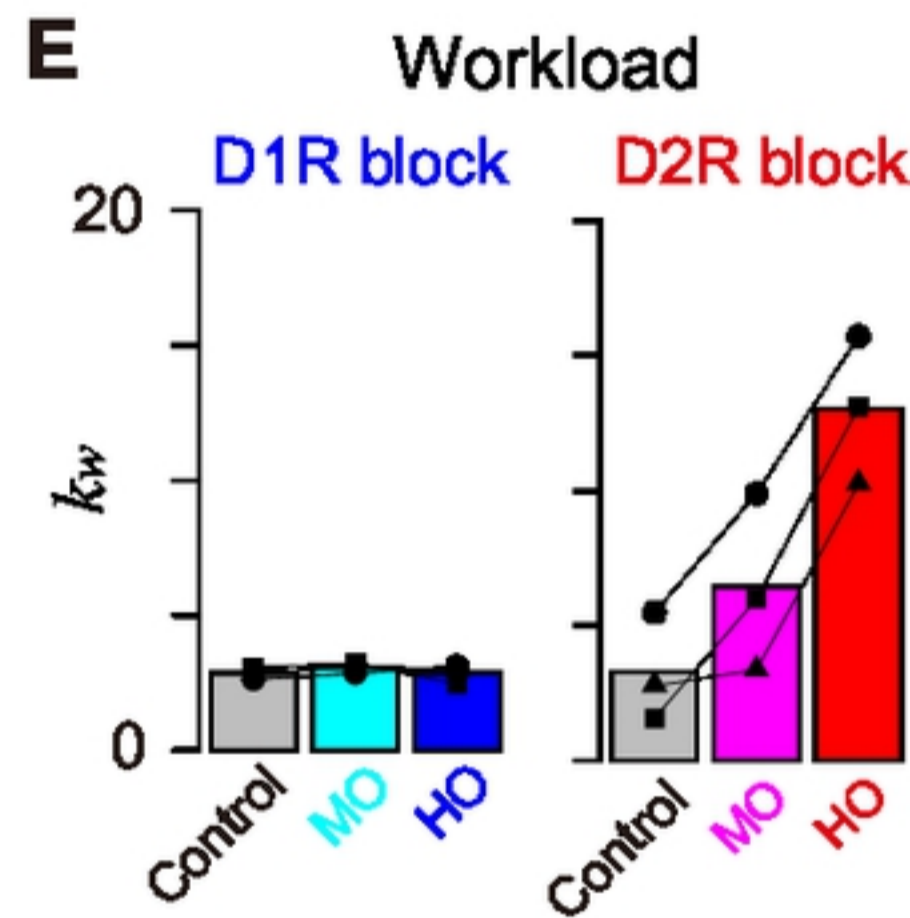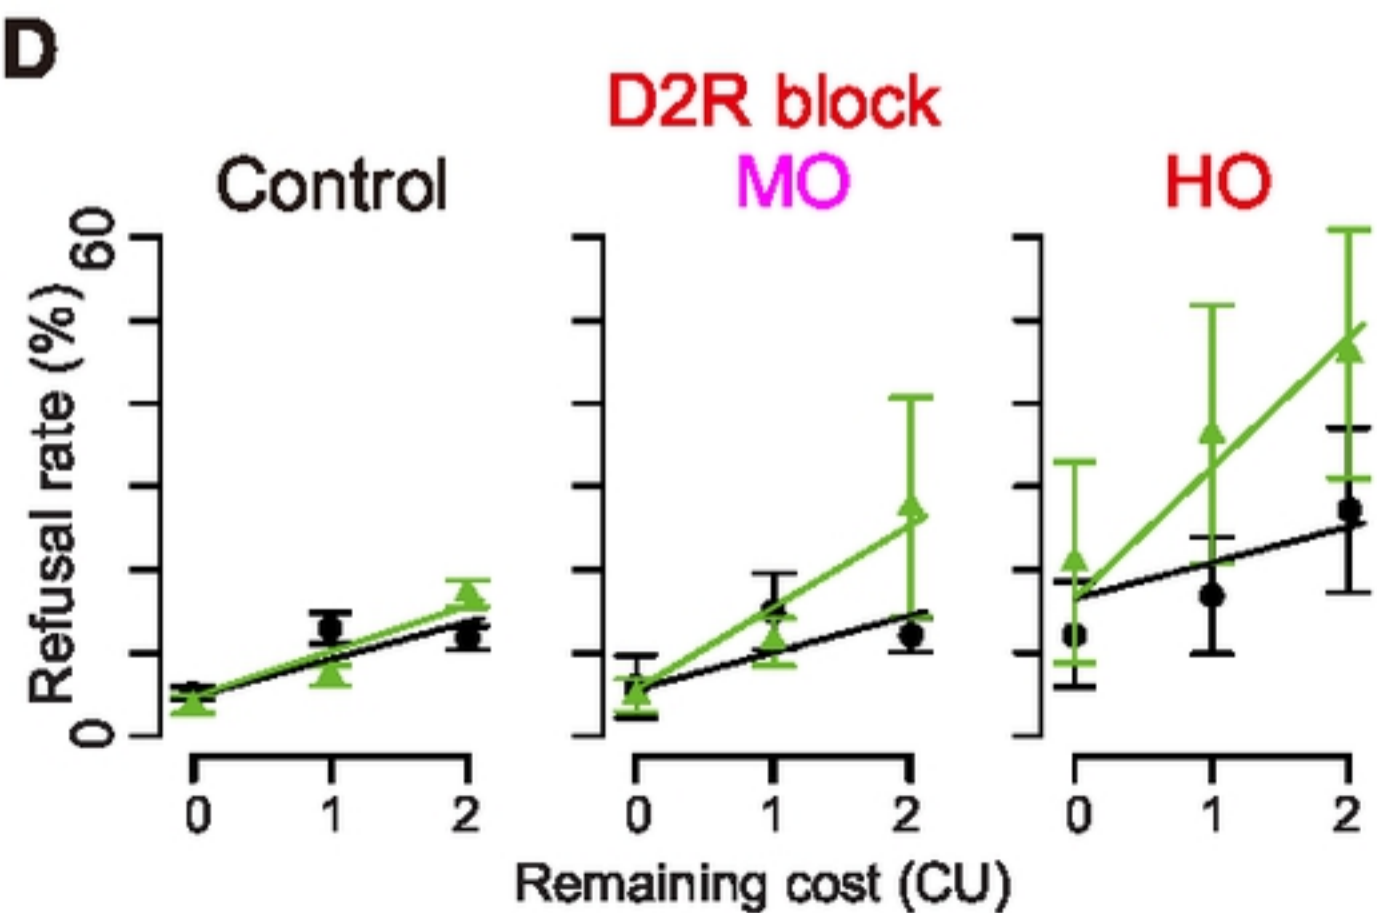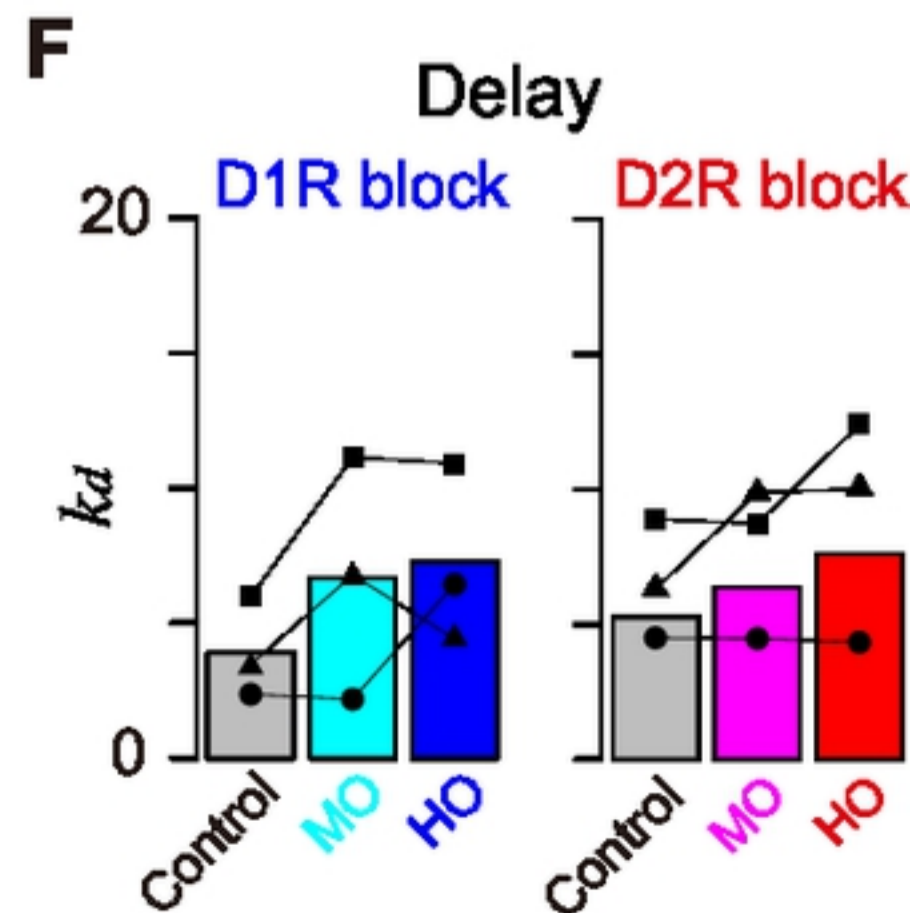

Figure4

**A**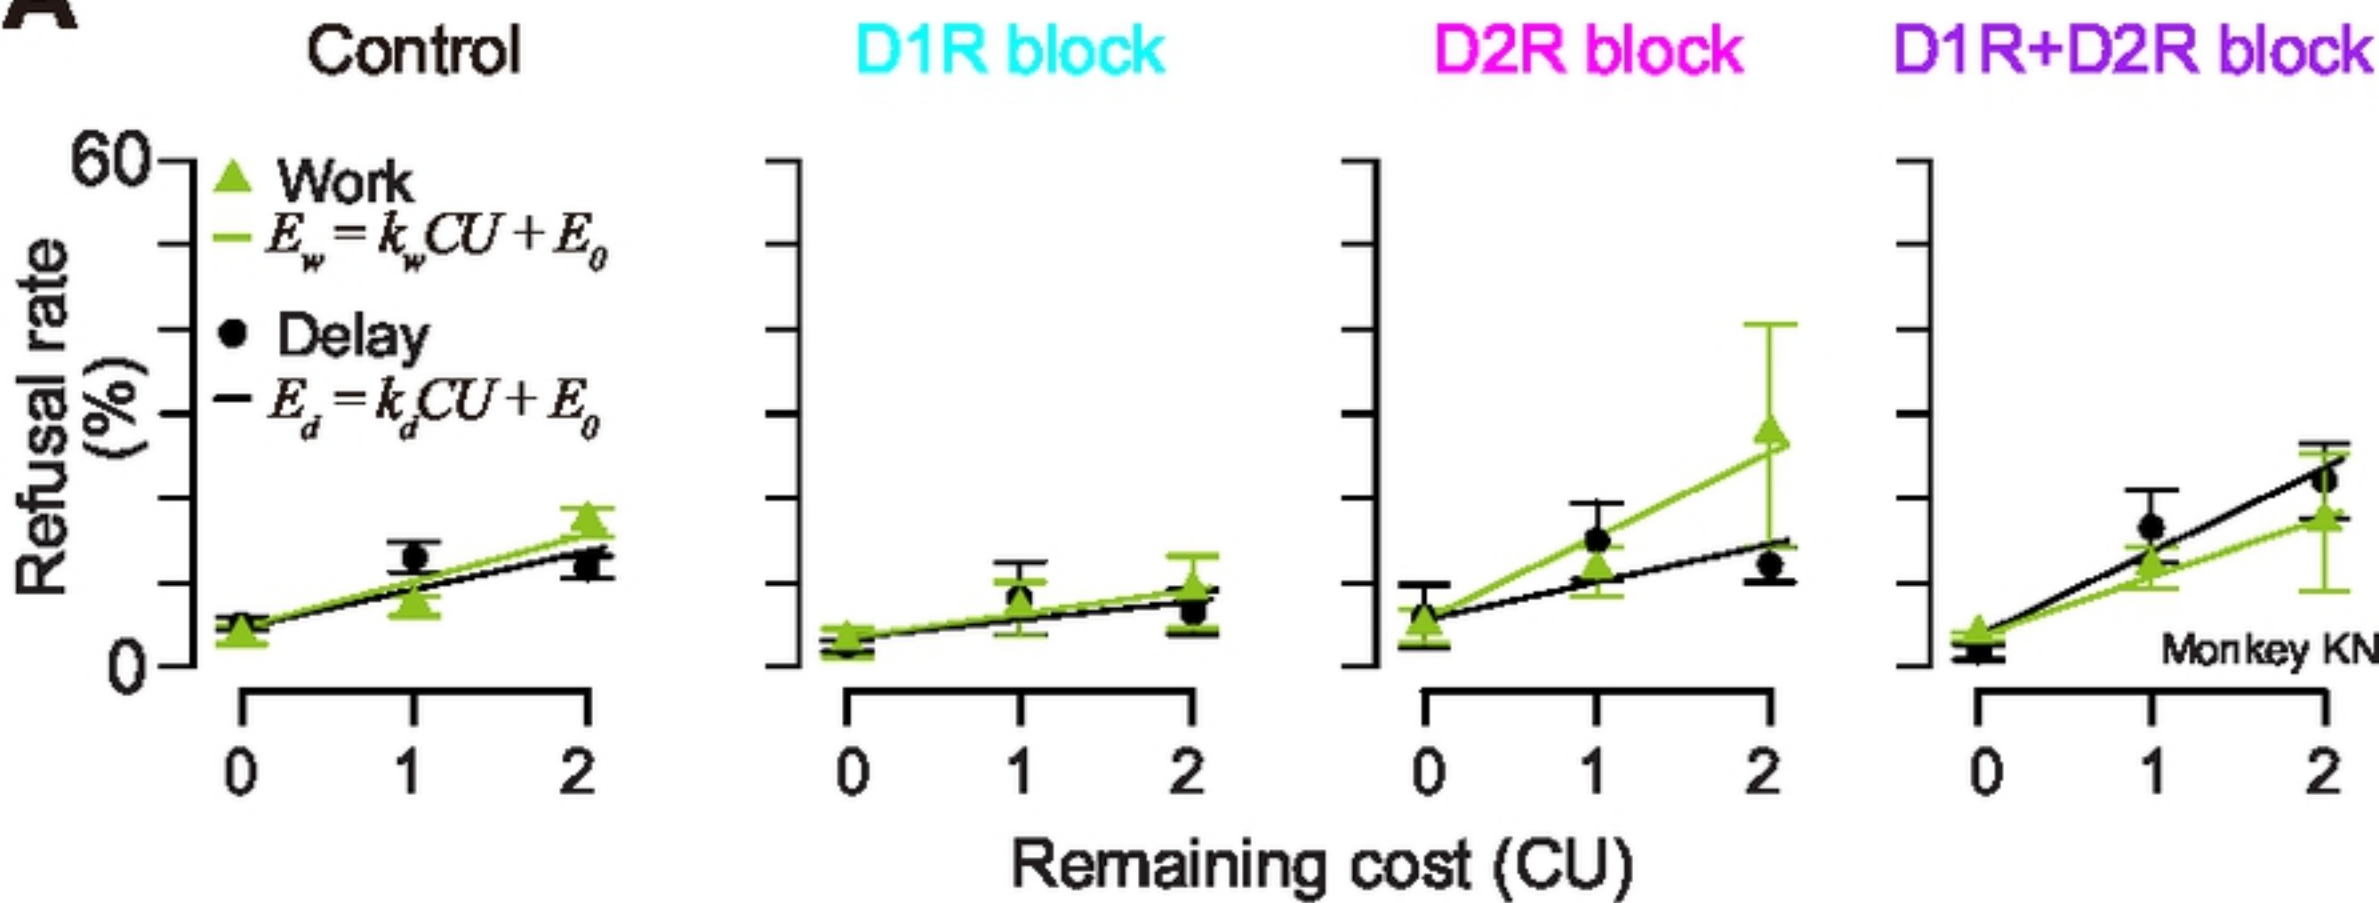**B**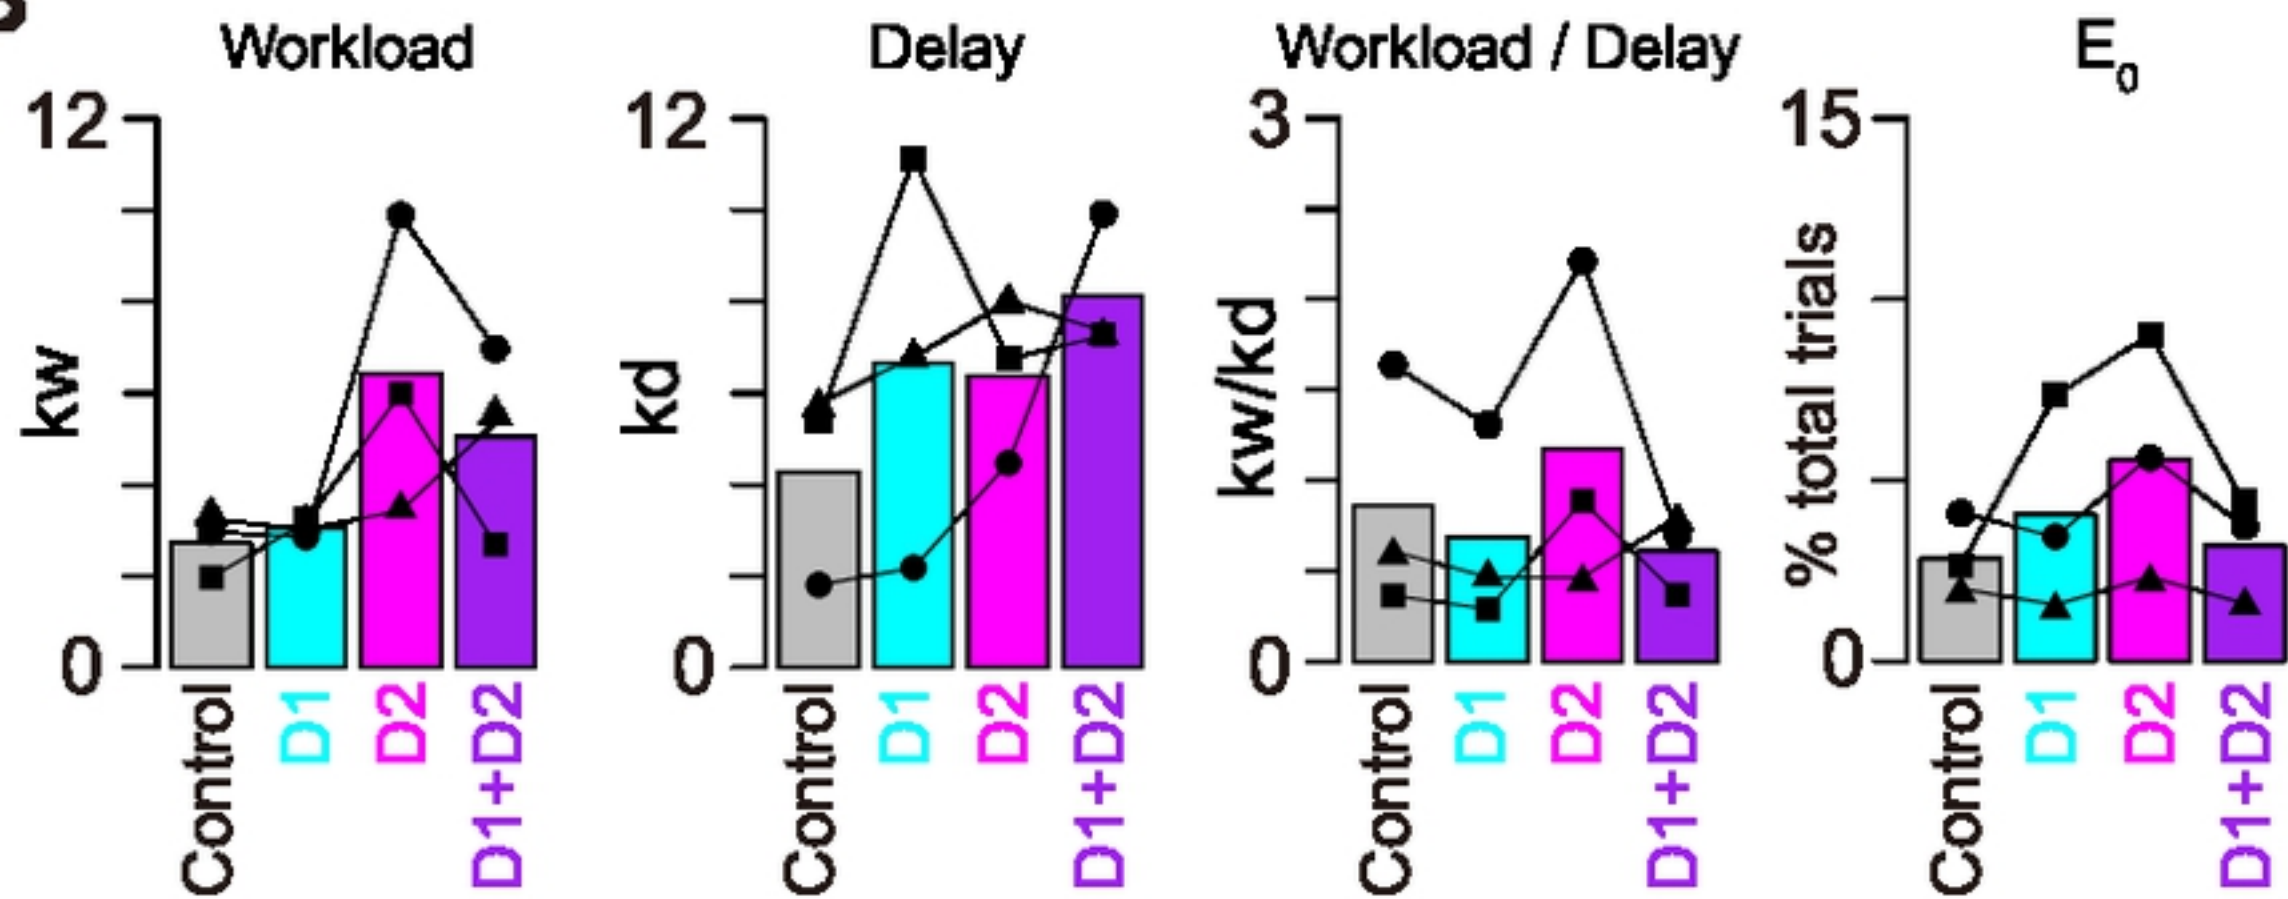

Figure5

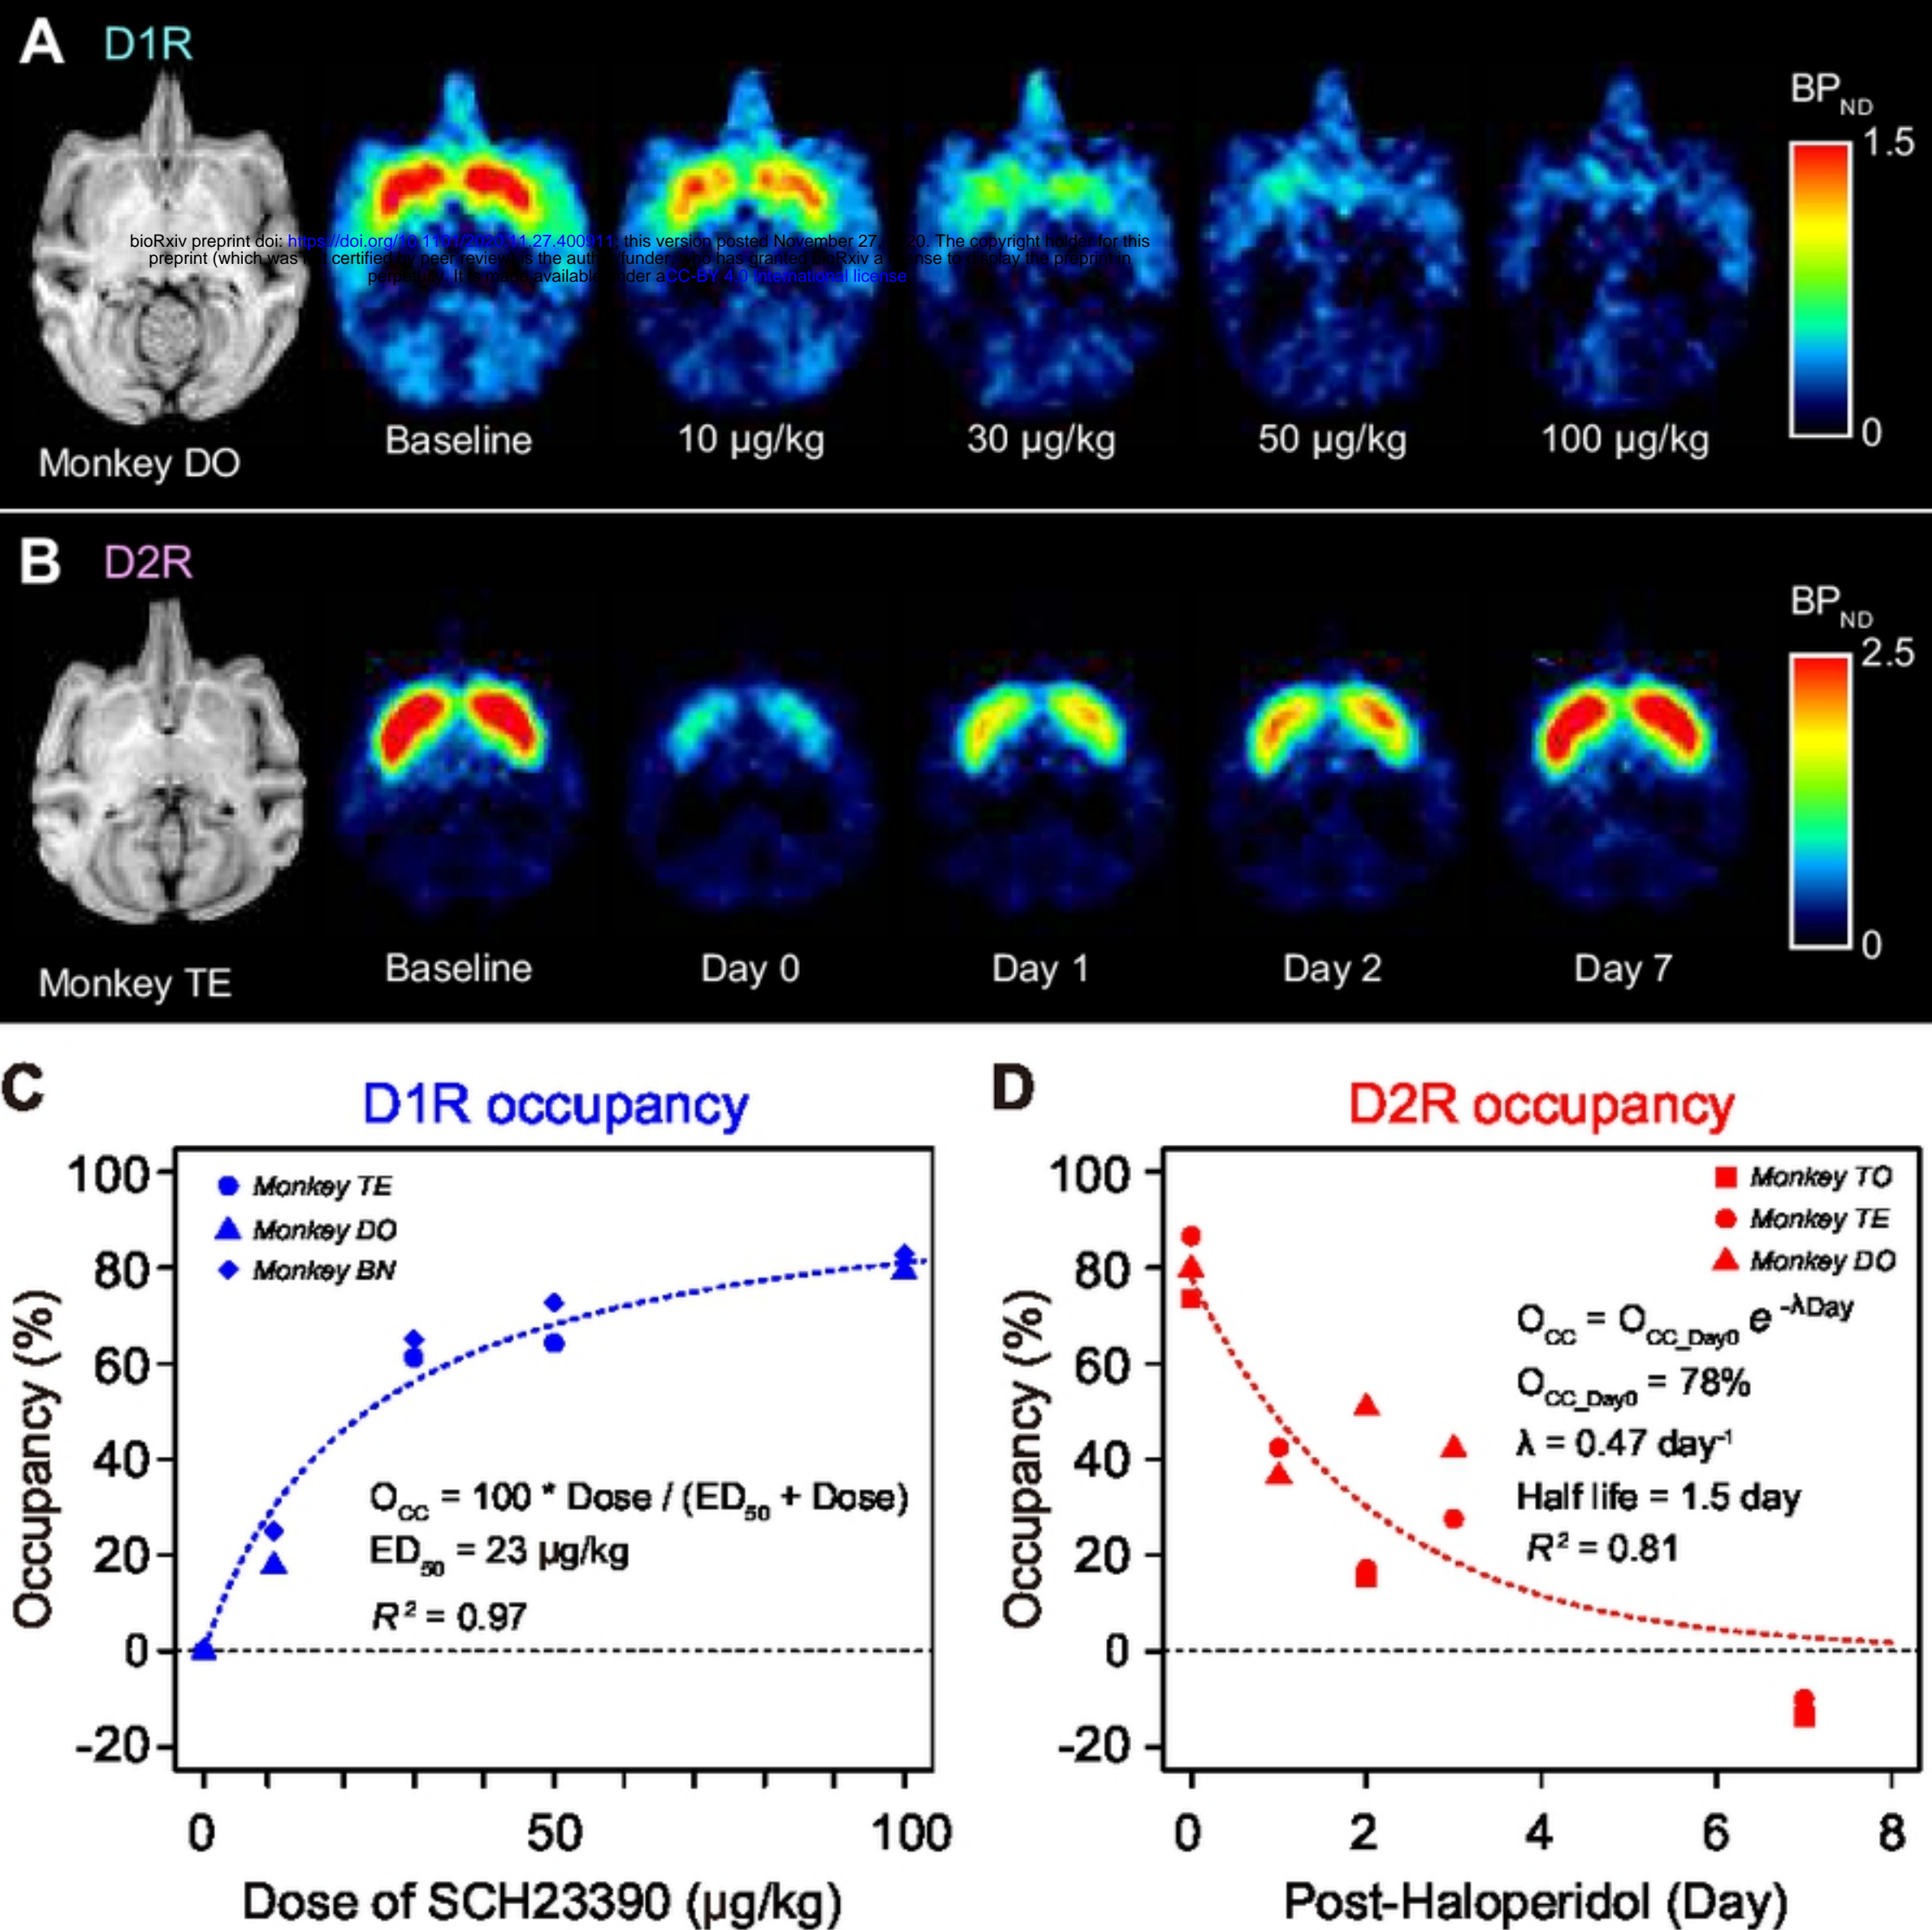

Figure 1
